# Supplementary material for: Modification of Natural Proanthocyanidin Oligomers and Polymers Via Chemical Oxidation under Alkaline Conditions
Source: PubMed Central journal article supplement — ACS Omega. 2021 Feb 9;6(7):4726–39. doi: 10.1021/acsomega.0c05515 (PMC7906247; doi:10.1021/acsomega.0c05515), 2021-02-09

## Supporting Information

### Modification of Natural Proanthocyanidin Oligomers and Polymers via Chemical Oxidation in Alkaline Conditions

Iqbal Bin Imran, Maarit Karonen, Juha-Pekka Salminen and Marica T. Engström\*

Natural Chemistry Research Group, Department of Chemistry, University of Turku, FI-20014  
Turku, Finland

\*Corresponding author: Marica T. Engström, E-mail: [mtengs@utu.fi](mailto:mtengs@utu.fi), Phone: +358 29 450 3168

**Figure S1.** UHPLC-DAD profiles ( $\lambda=280$  nm) before and after oxidation of the proanthocyanidin containing 102 studied plant samples. The upper panels show the non-oxidized samples and the lower panels the oxidized samples. Each panels X-axis refer to retention time (min) and Y-axis refer to intensity (AU). Sample numbers refer to Table 1.

1. *Viburnum tinus*

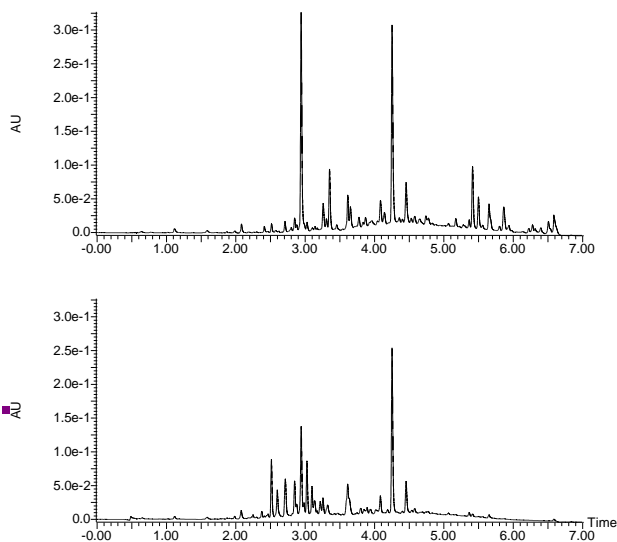

2. *Mandevilla splendens*

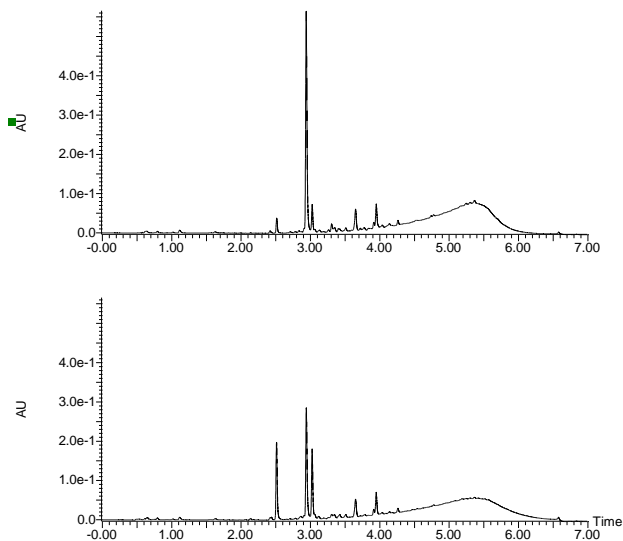

3. *Aglaonema commutatum* var. *maculatum*

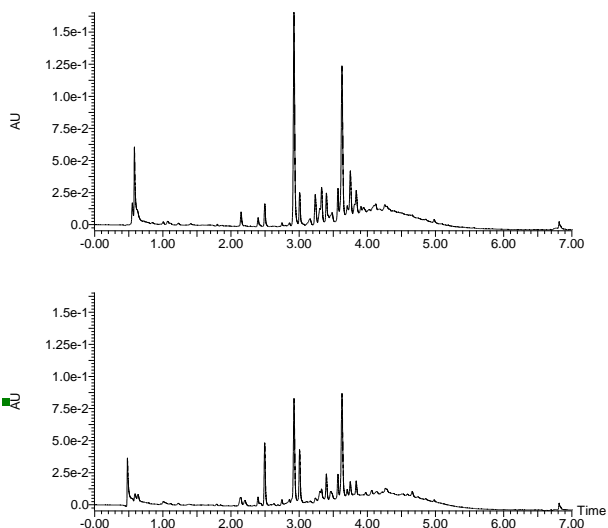

4. *Aglaonema crispum*

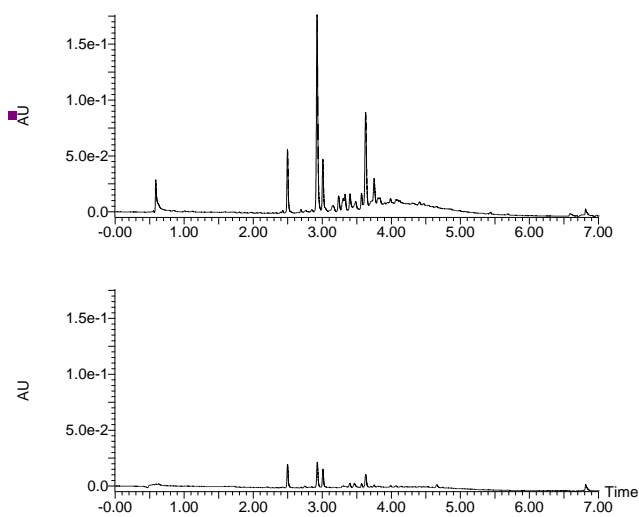

5. *Aglaonema treubii*

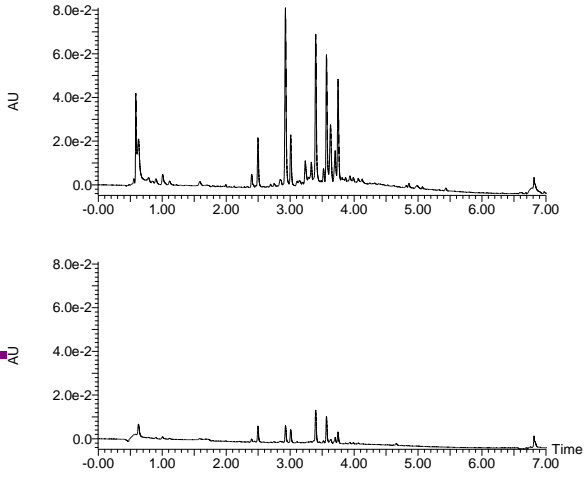

6. *Araucaria bidwillii*

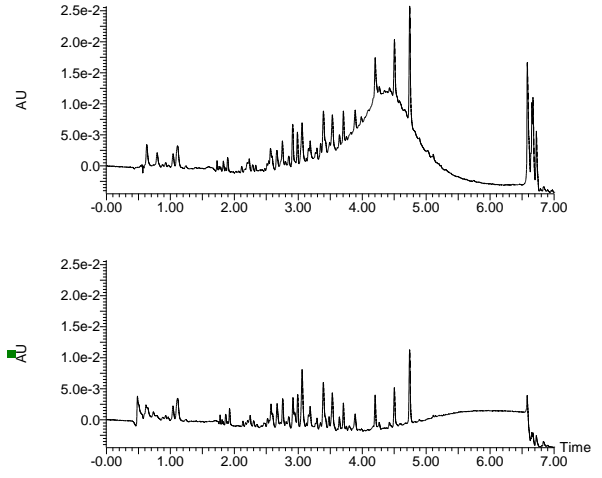

7. *Wollemia nobilis*

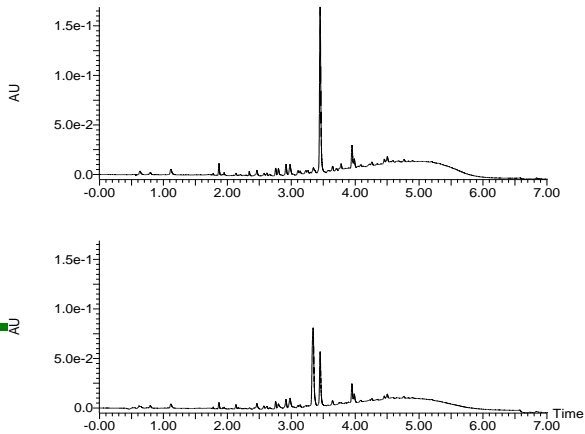

8. *Dianella ensifolia*

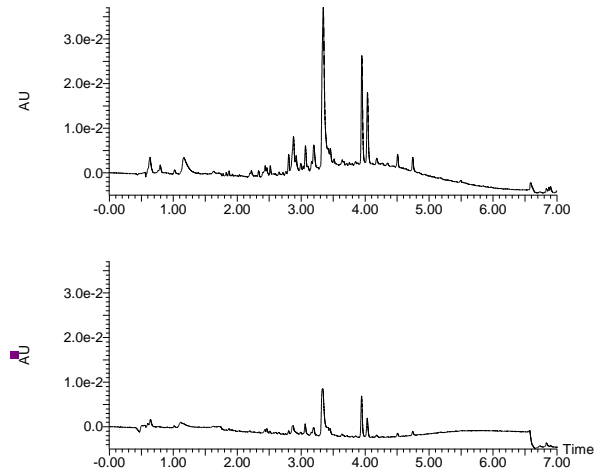

9. *Dianella intermedia*

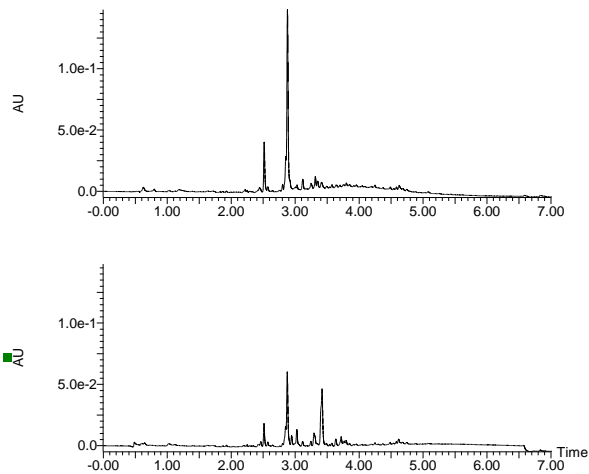

10. *Impatiens repens*

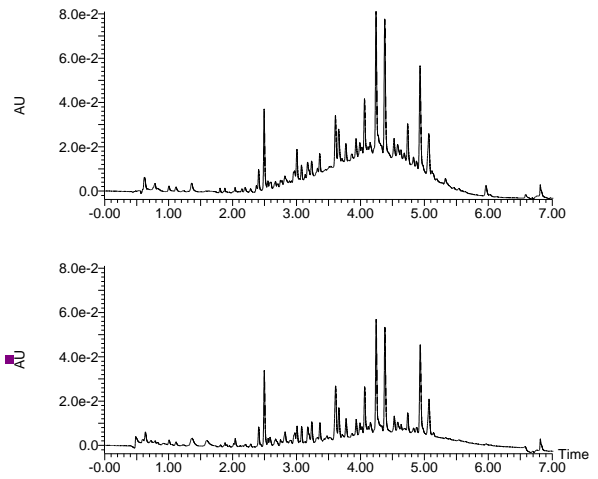

11. *Begonia bowerae* 'Nigra'

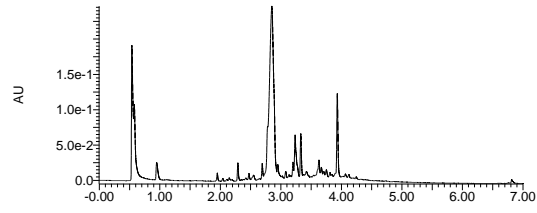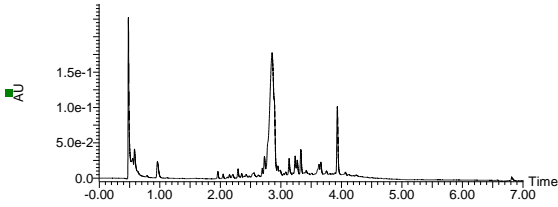

12. *Allocasuarina campestris*

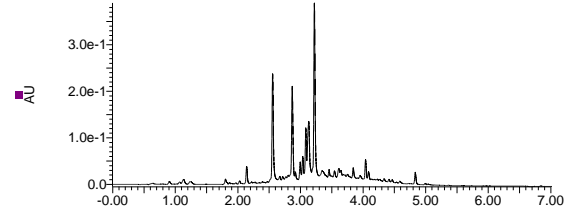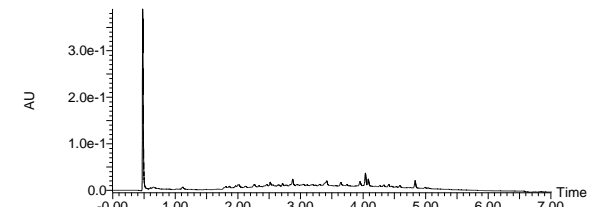

13. *Cephalotaxus harringtonia* subsp. *drupacea*

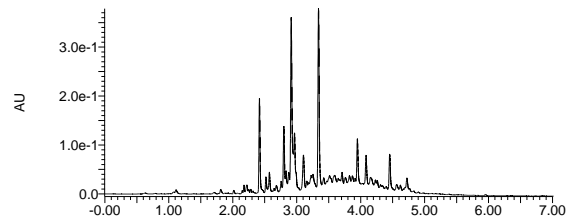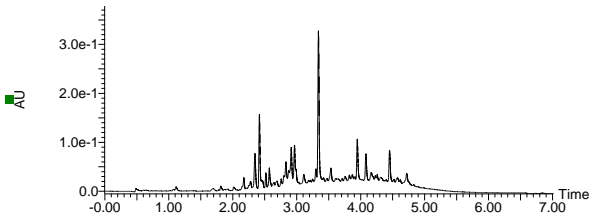

14. *Callisia gentlei* var. *elegans*

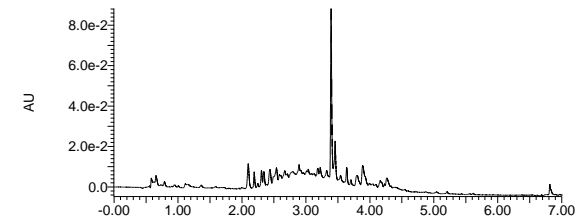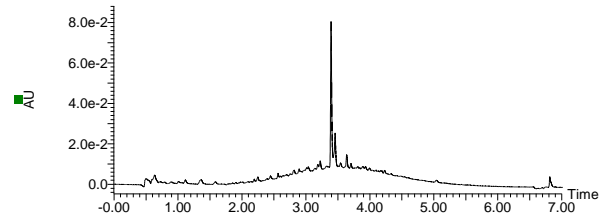

15. *Combretum bracteosum*

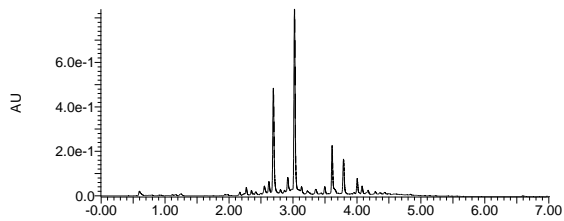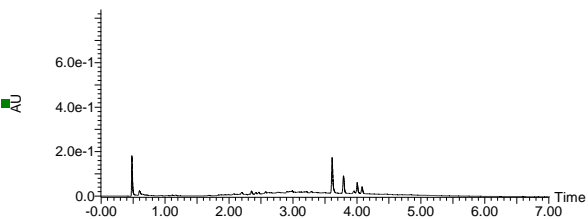

16. *Combretum indicum*

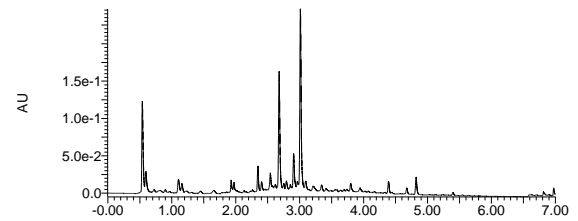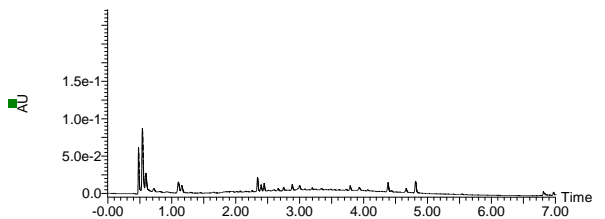

17. *Aeonium arboreum*

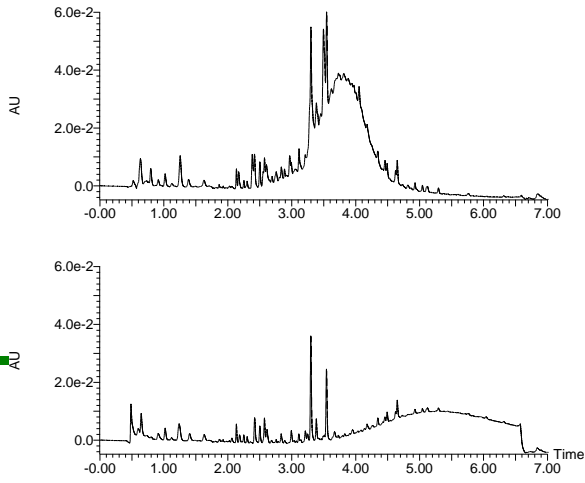

18. *Crassula ovata*

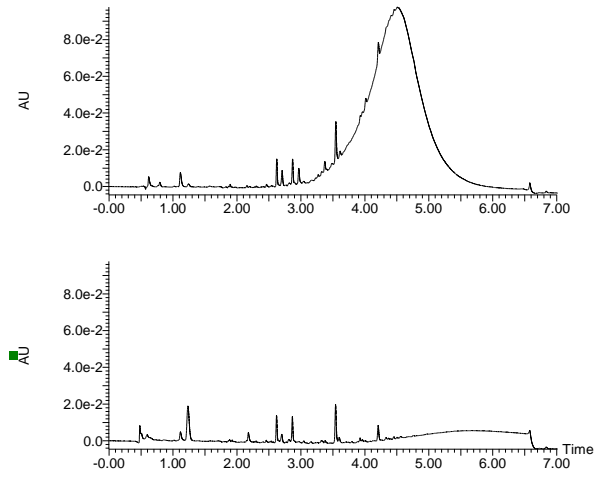

19. *Echeveria harmsii*

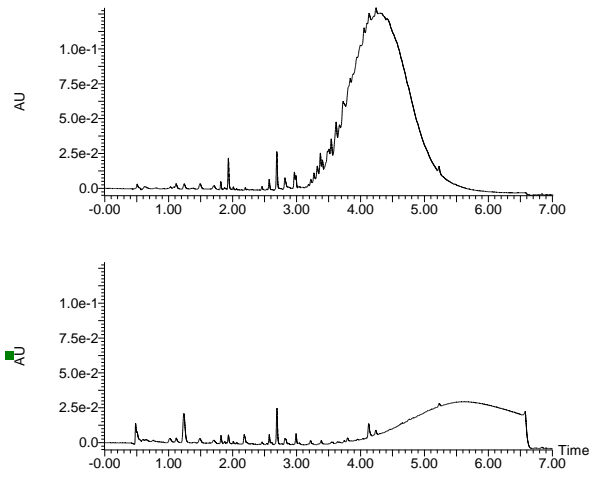

20. *Kalanchoë manginii*

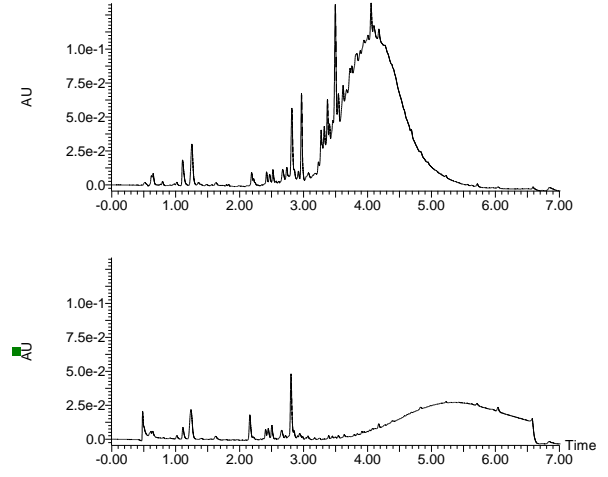

21. *Pachyphytum hookeri*

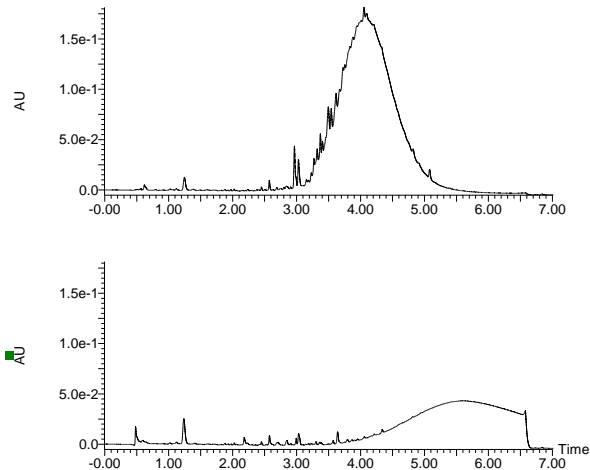

22. *Sedum rubrotinctum*

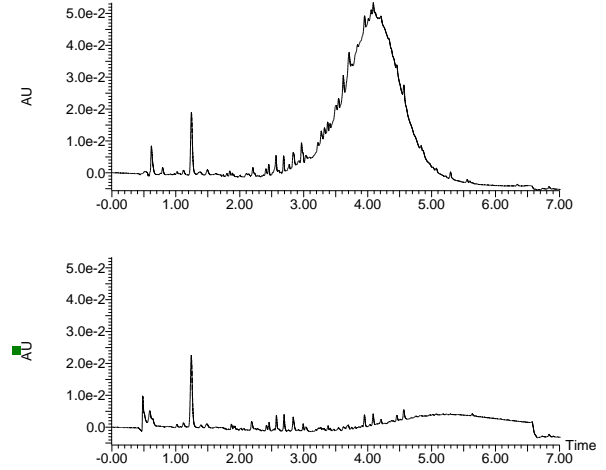

23. *Villadia batesii*

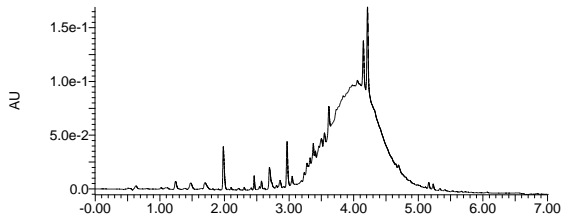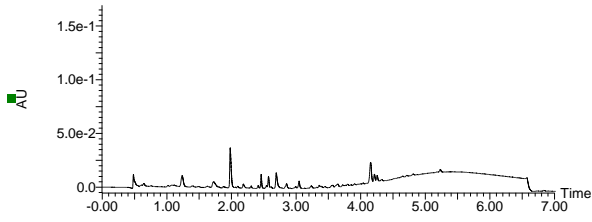

24. *Cunninghamia lanceolata*

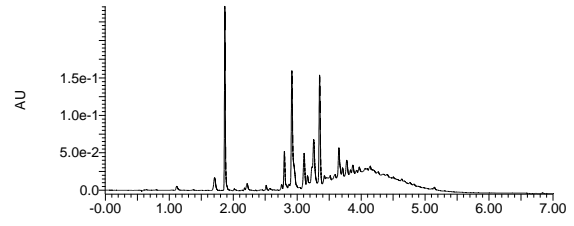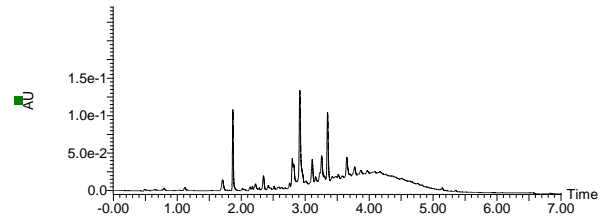

25. *Cupressus bakeri*

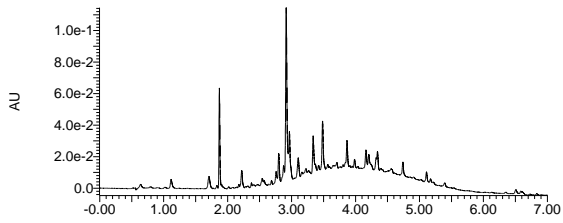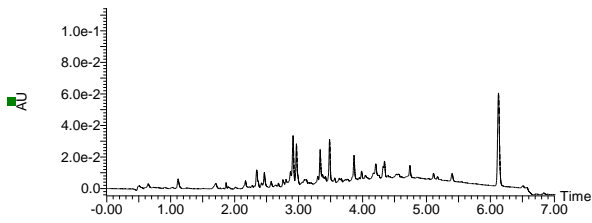

26. *Sequoia sempervirens*

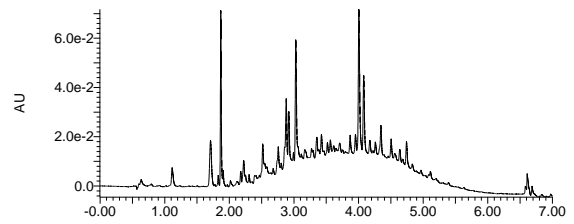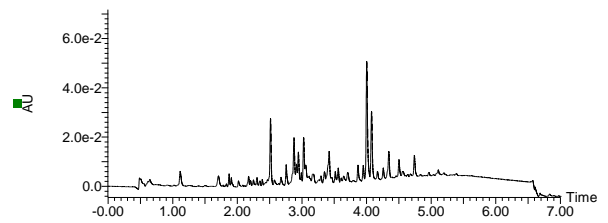

27. *Tetraclinis articulata*

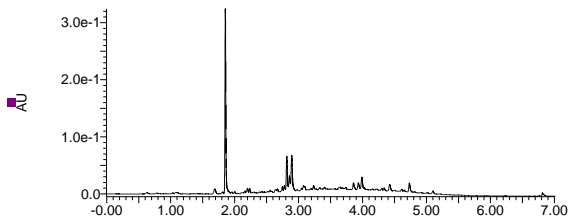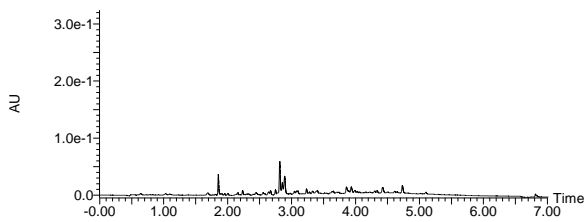

28. *Cyperus owanii*

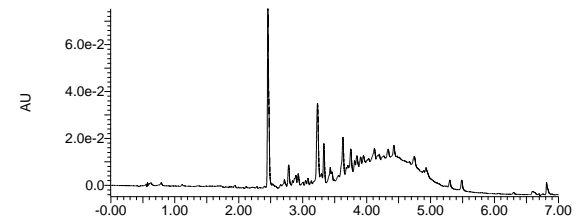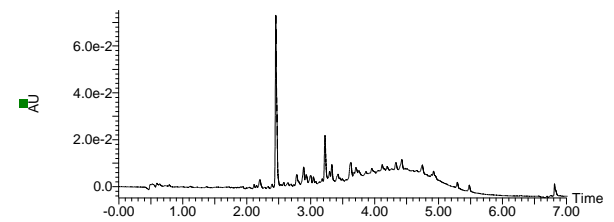

29. *Cyperus owanii*

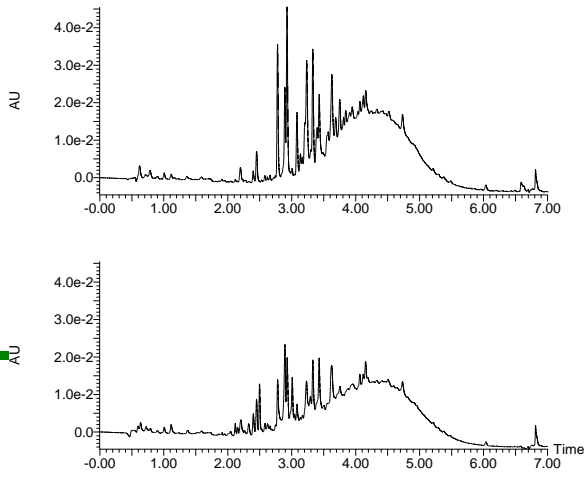

30. *Davallia pyxidata*

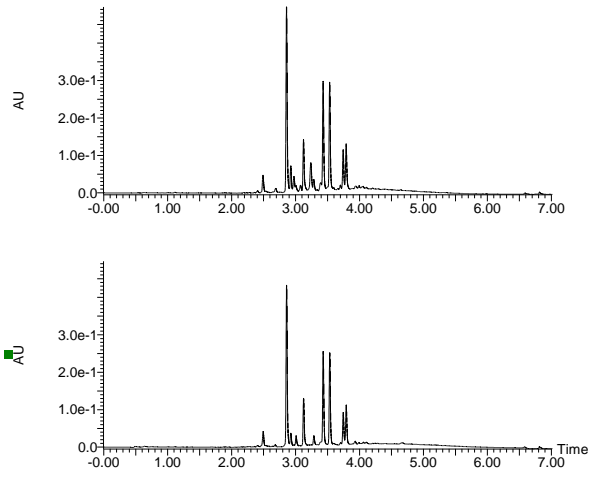

31. *Dicksonia squarrosa*

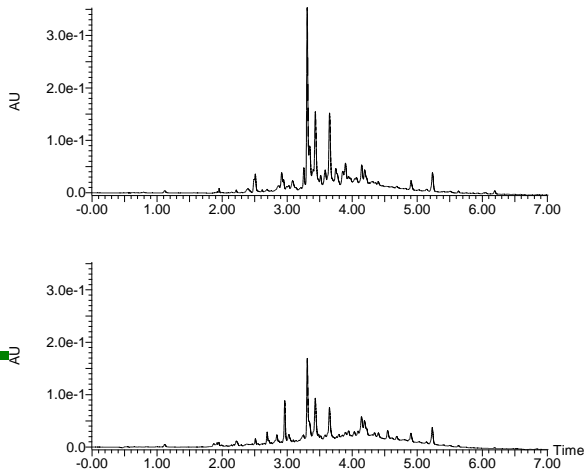

32. *Cyrtomium falcatum*

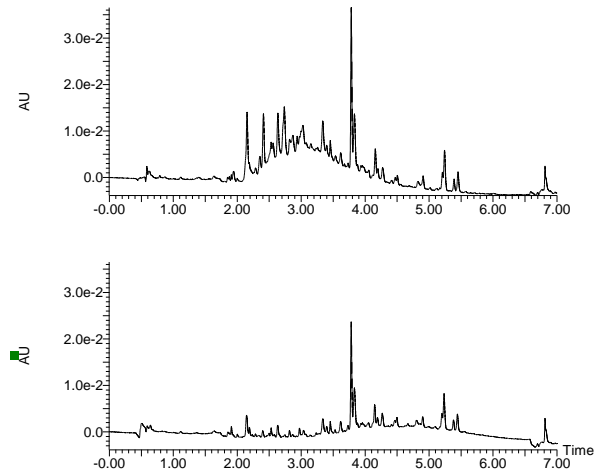

33. *Polystichum proliferum*

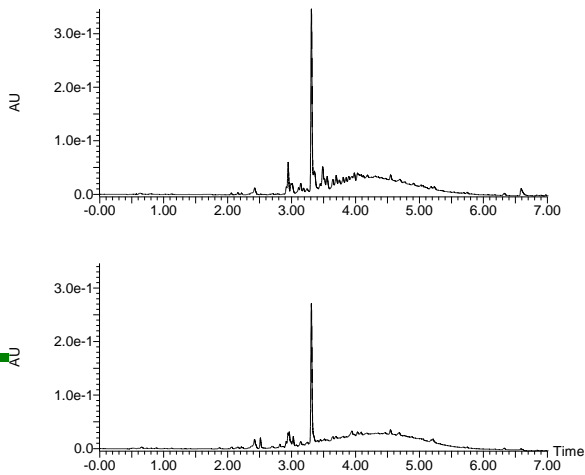

34. *Diospyros mespiliformis*

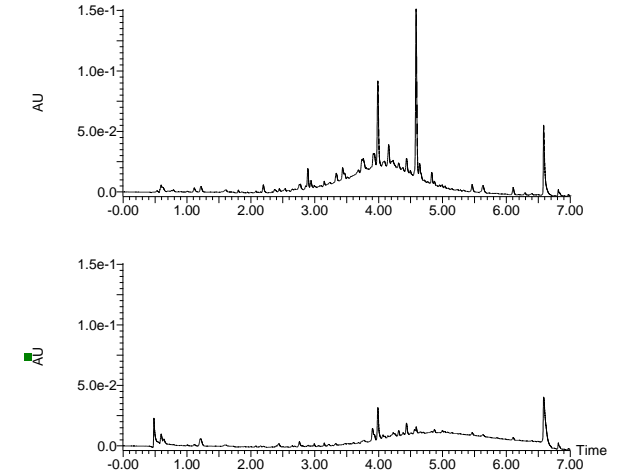

35. *Rhododendron hemitrichotum*

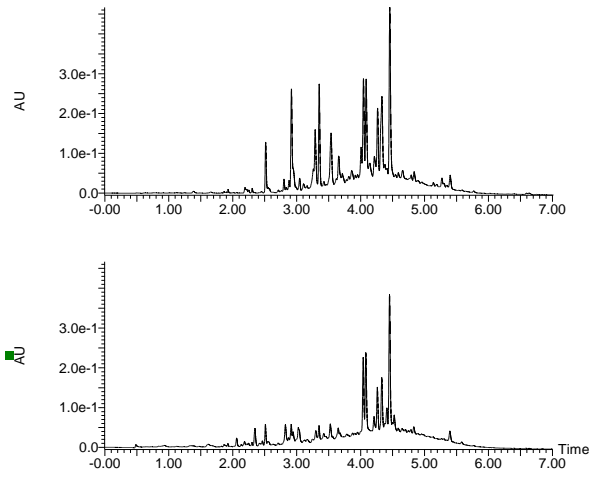

36. *Rhododendron hemitrichotum*

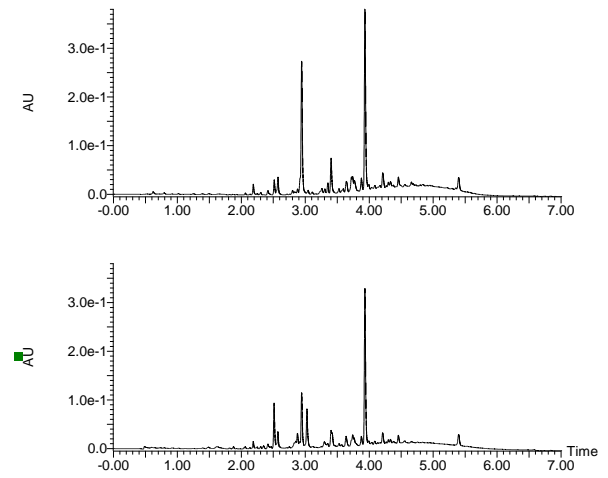

37. *Euphorbia characias* (leaves)

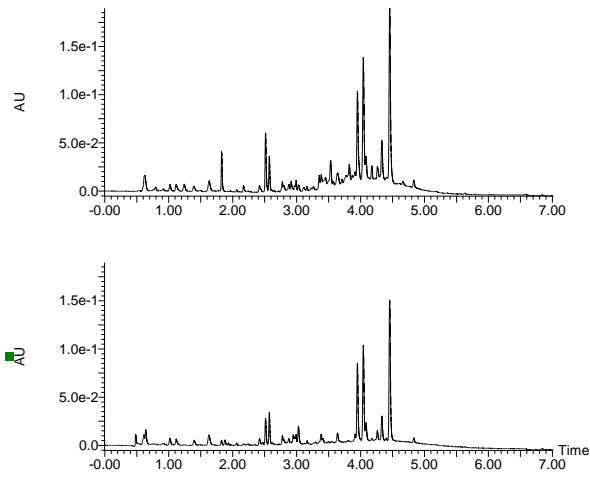

38. *Euphorbia characias* (flowers)

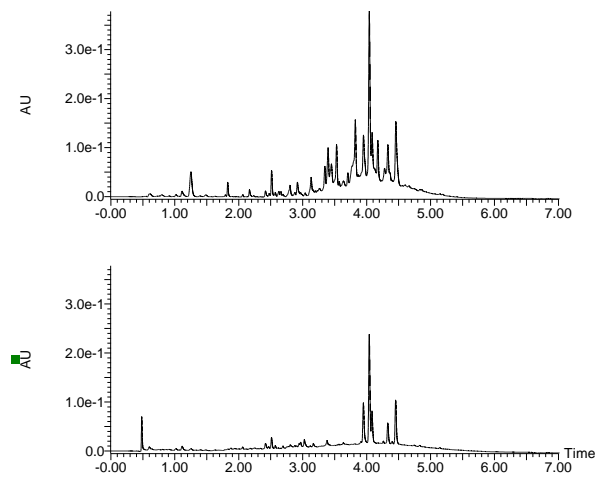

39. *Acacia karroo*

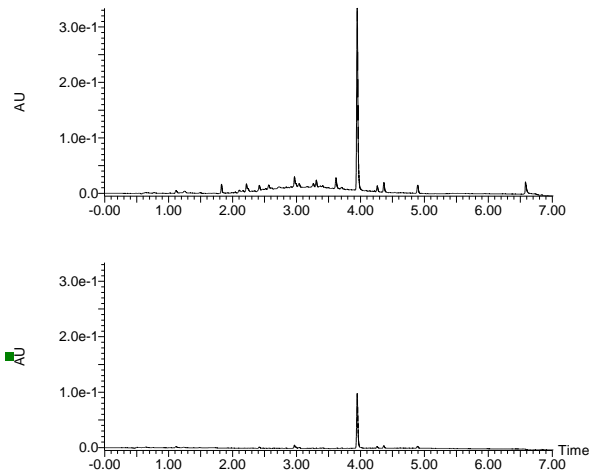

40. *Acacia melanoxylon*

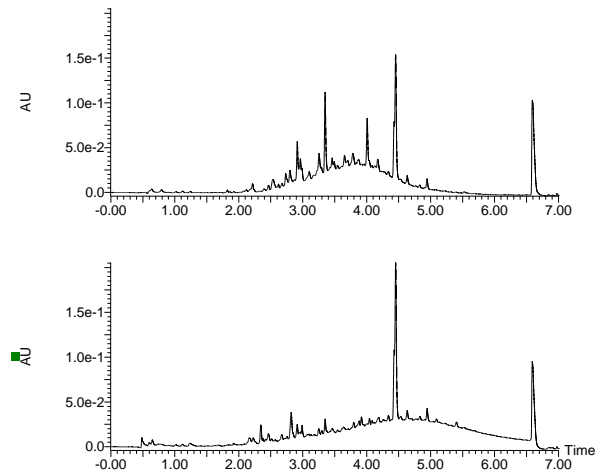



41. *Acacia victoriae*

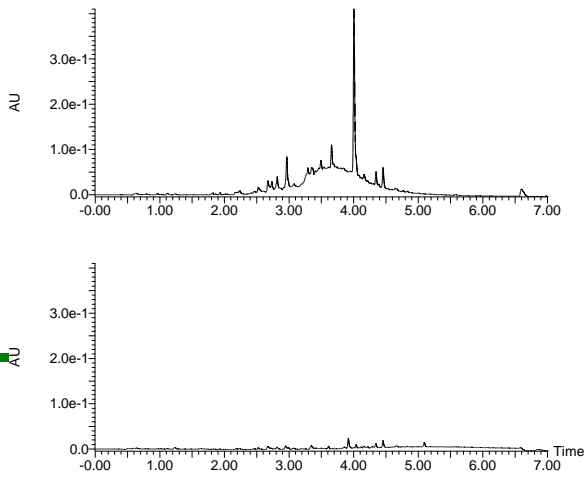

42. *Bauhinia variegata*

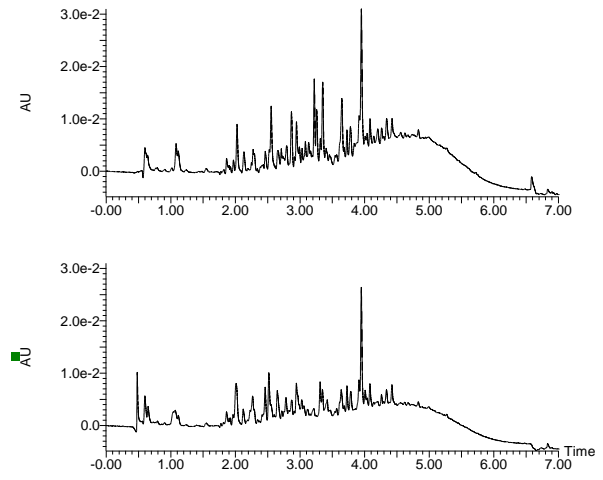

43. *Calliandra haematocephala*

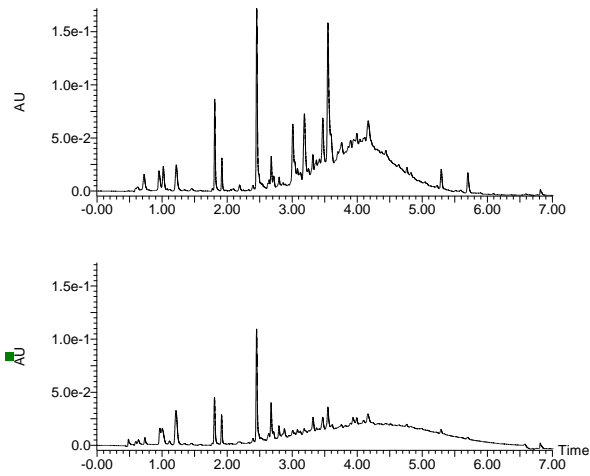

44. *Ceratonia siliqua*

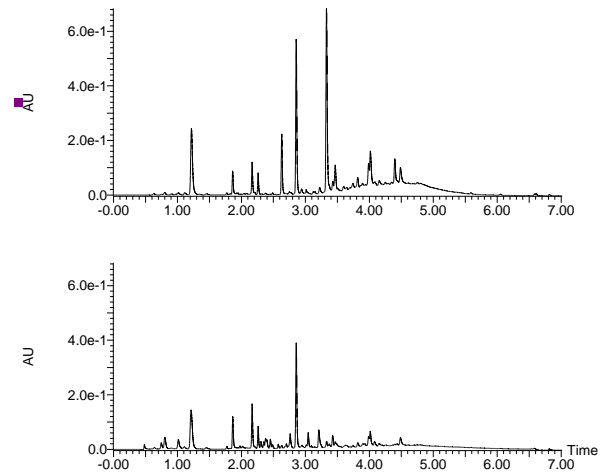

45. *Mimosa polycarpa*

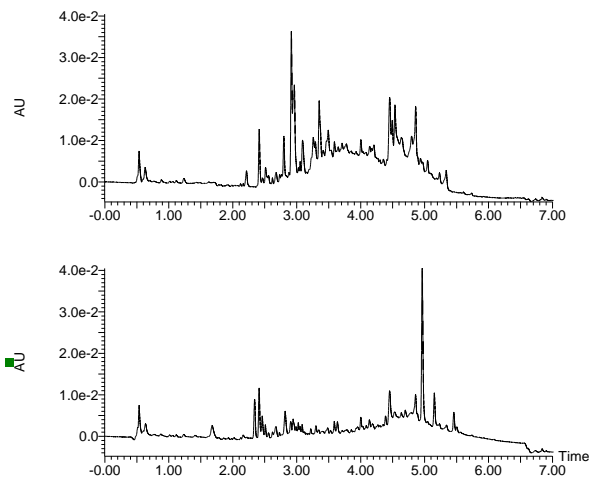

46. *Newtonia buchananii*

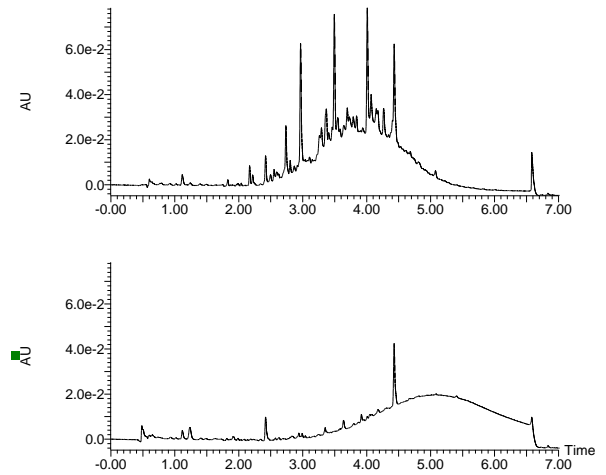

47. *Quercus ilex*

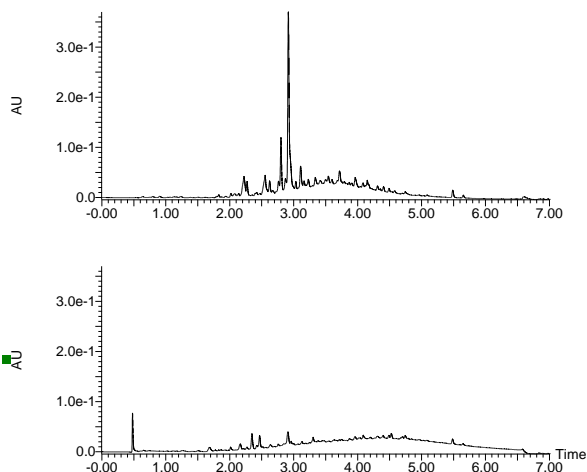

48. *Pelargonium odoratissimum*

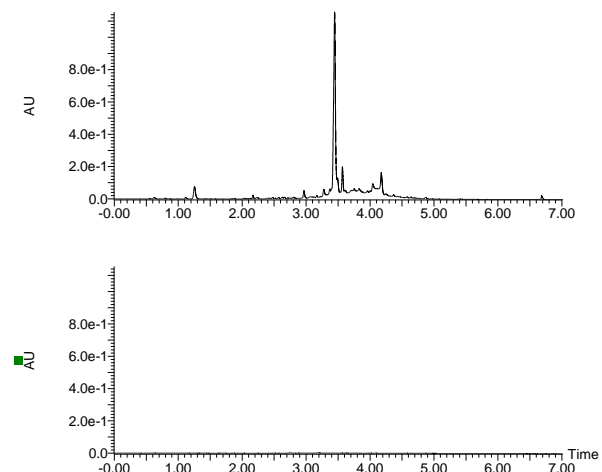

49. *Apollonias barbujana*

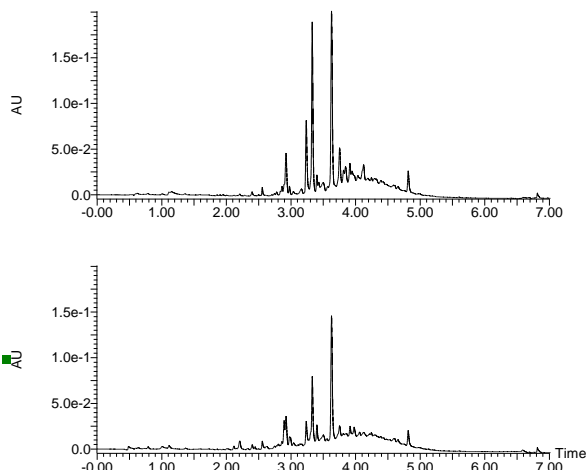

50. *Laurus nobilis*

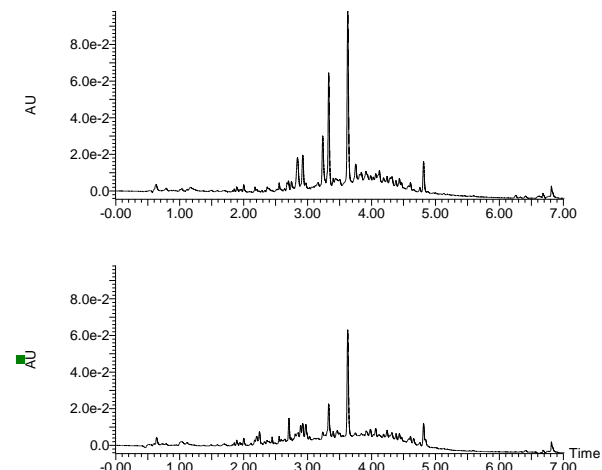

51. *Heritiera solomonensis*

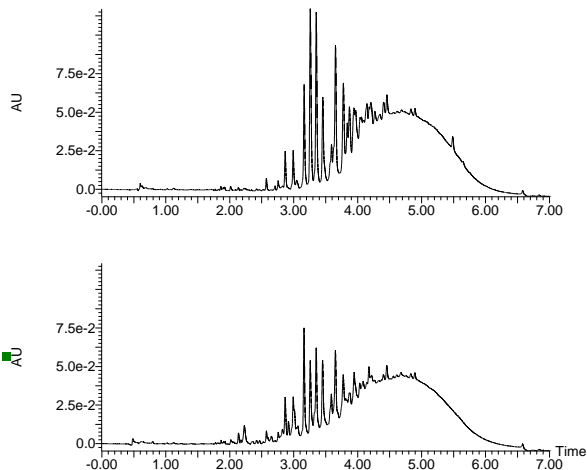

52. *Pavonia cauliflora*

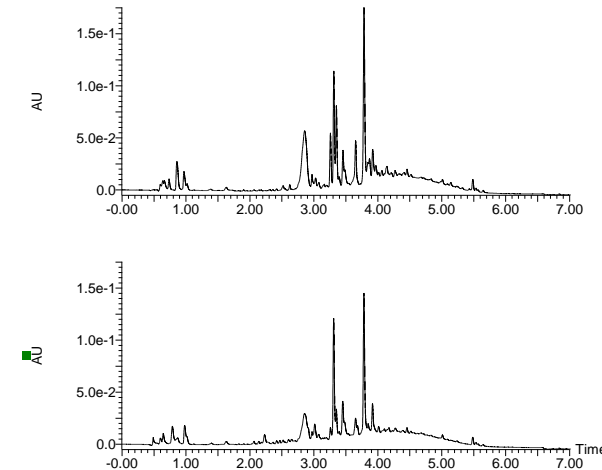

53. *Marcgravia umbellata*

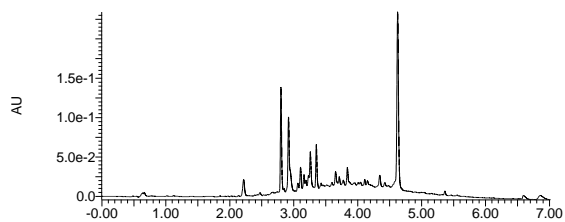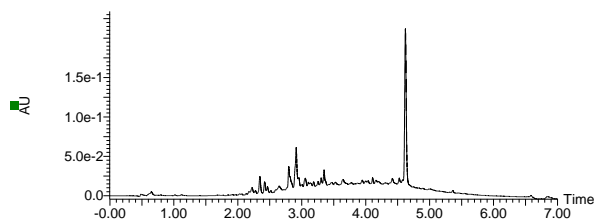

54. *Medinilla magnifica*

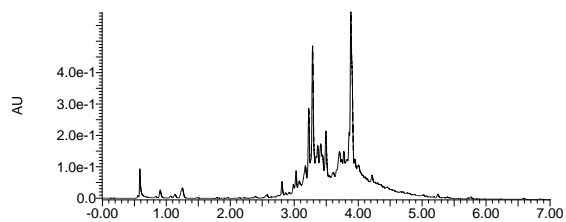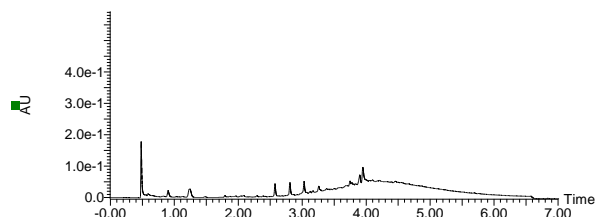

55. *Artocarpus sp.*

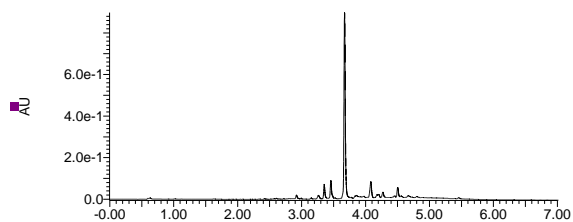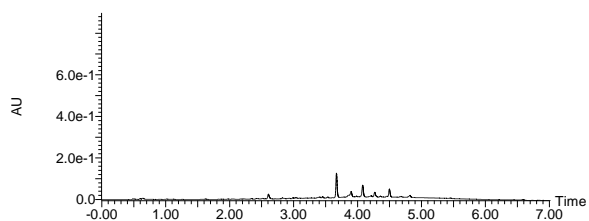

56. *Acca sellowiana*

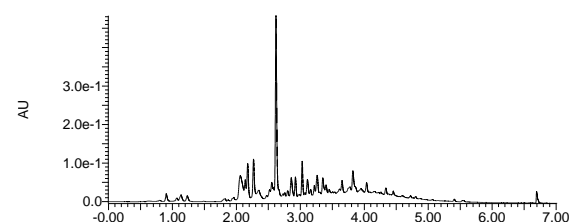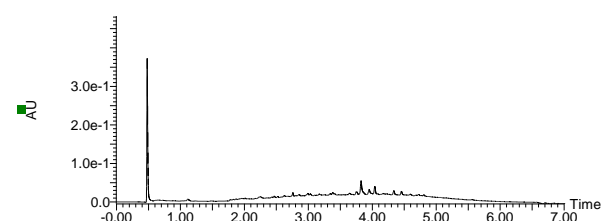

57. *Callistemon citrinus*

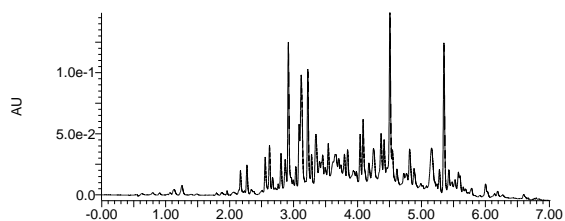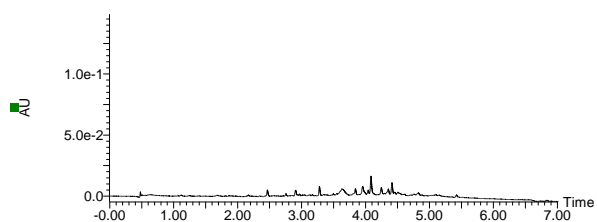

58. *Melaleuca squarrosa*

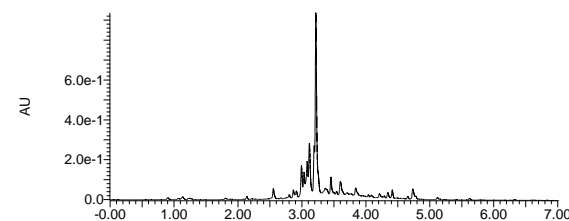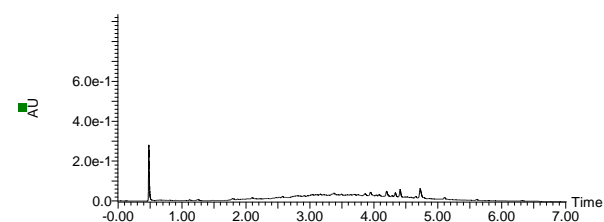

59. *Myrtus communis*

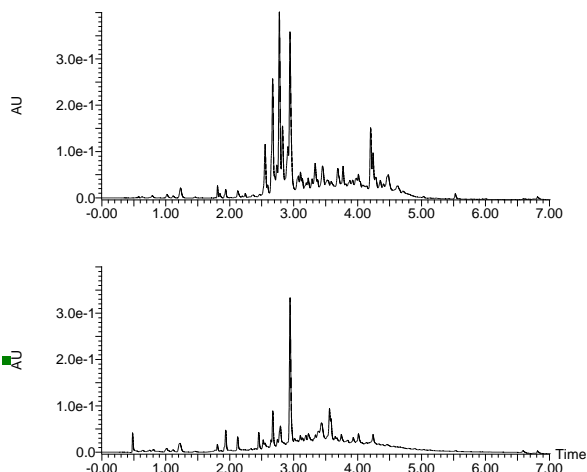

60. *Psidium cattleianum*

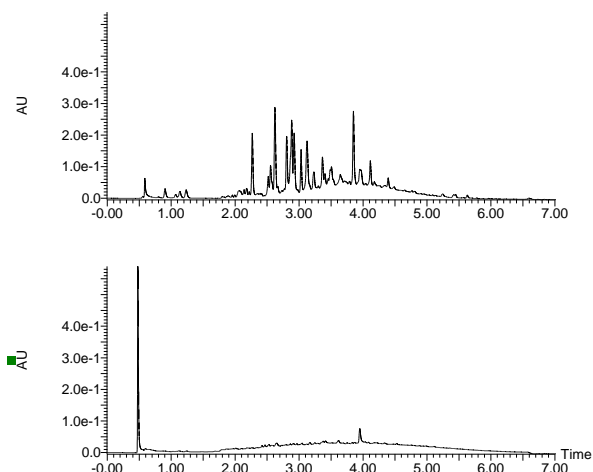

61. *Psidium cattleianum*

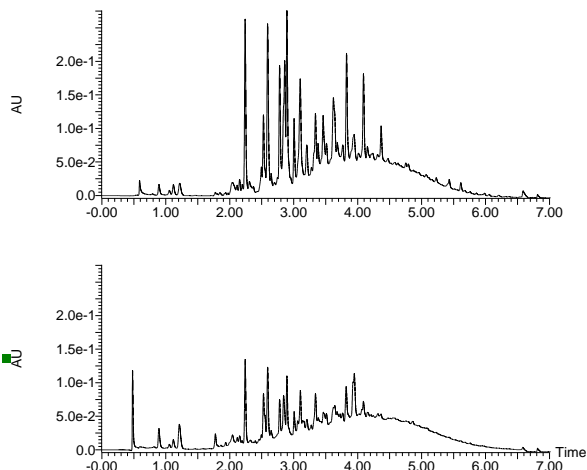

62. *Nepenthes maxima*

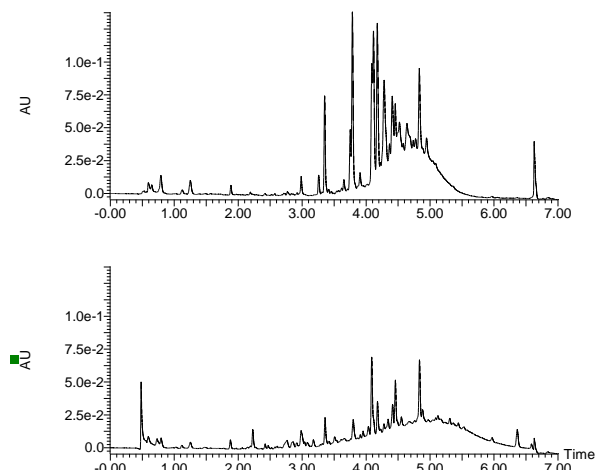

63. *Nepenthes maxima*

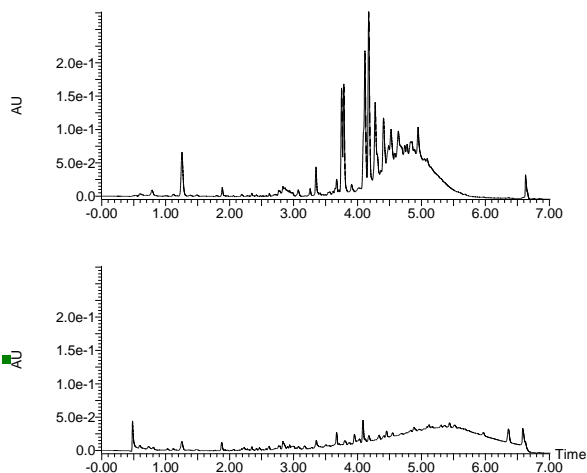

64. *Biophytum sensitivum*

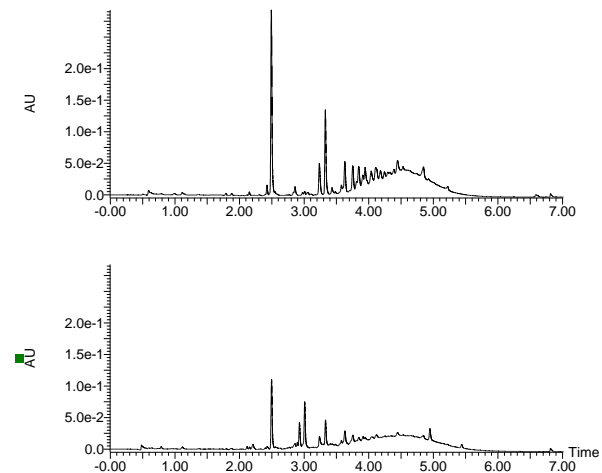

65. *Phyllanthus juglandifolius/grandifolius*

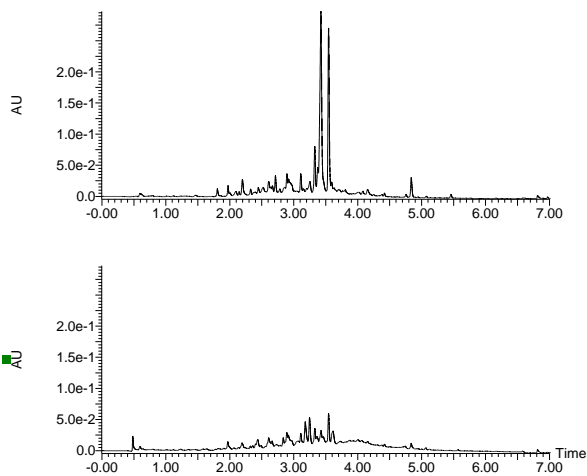

66. *Podocarpus macrophyllus*

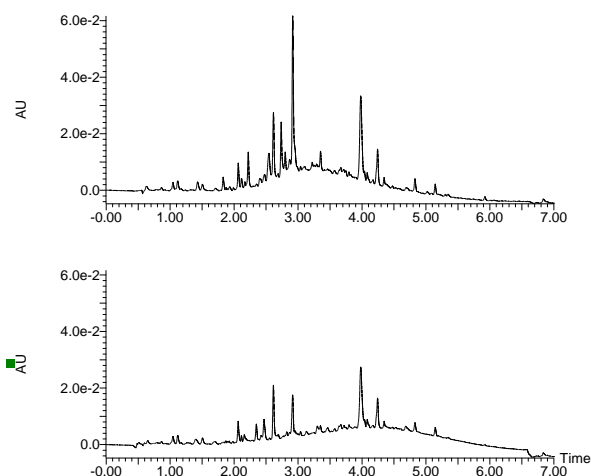

67. *Coccoloba uvifera*

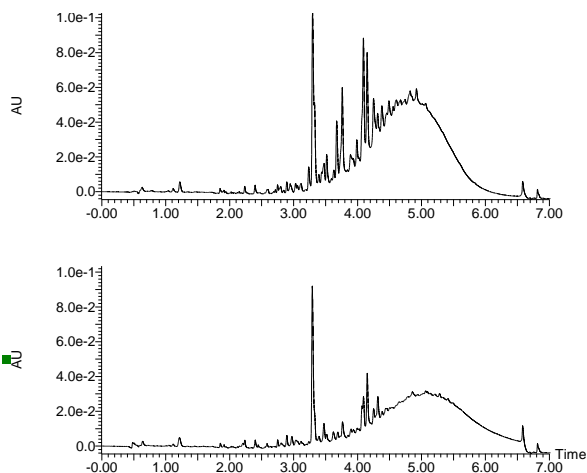

68. *Microgramma mauritiana*

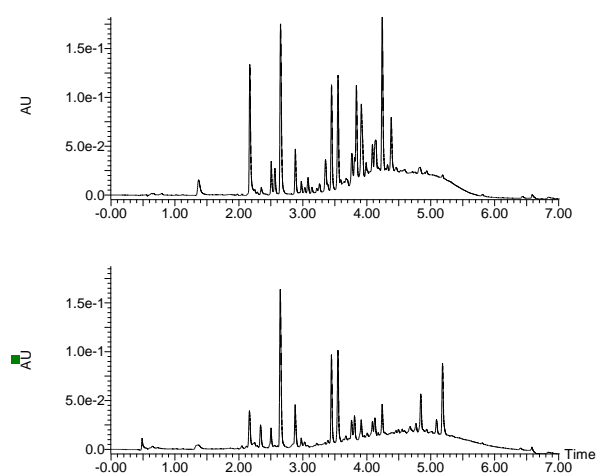

69. *Microgramma vacciniifolia*

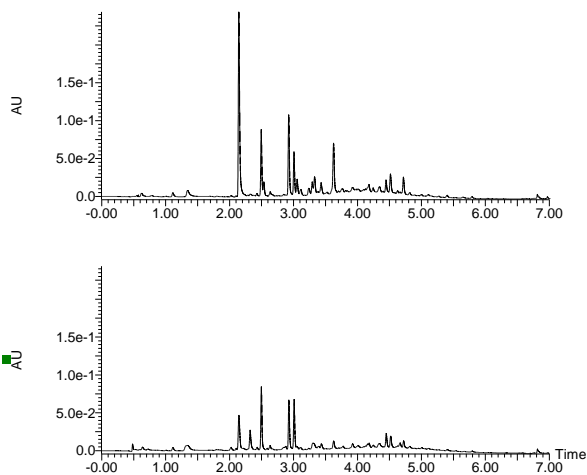

70. *Ruprechtia salicifolia*

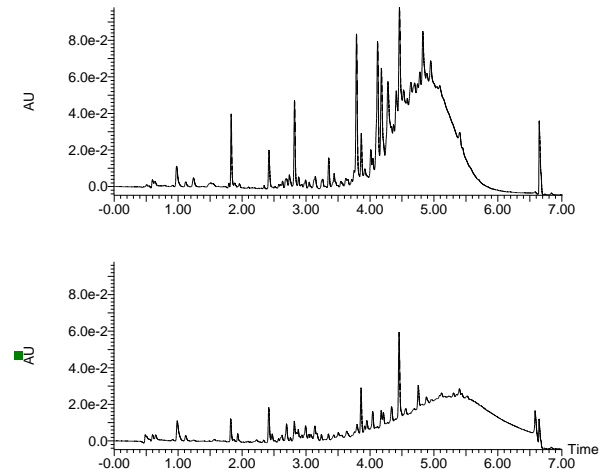

71. *Portulaca alata*

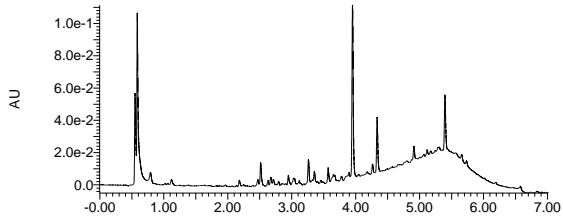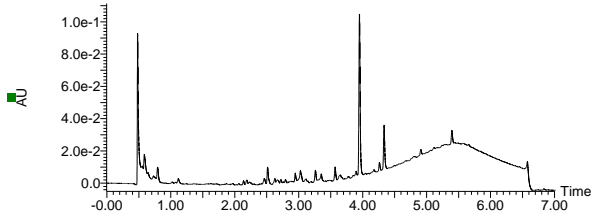

72. *Aegiceras corniculatum*

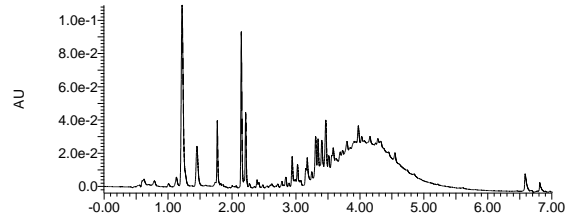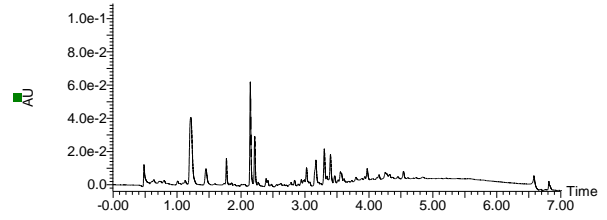

73. *Ardisia crenata*

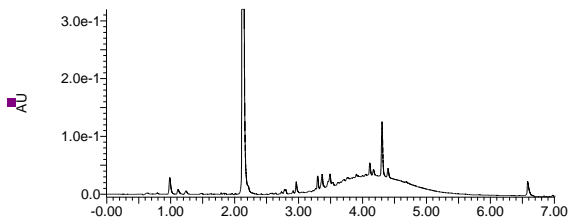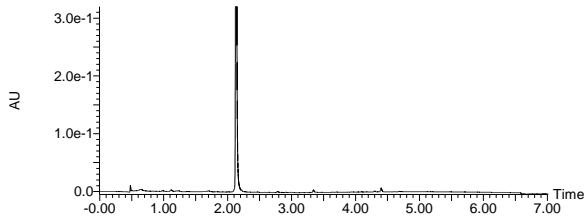

74. *Cyclamen africanum*

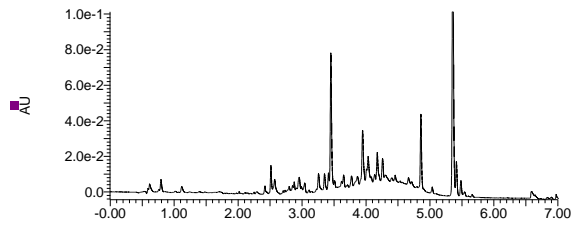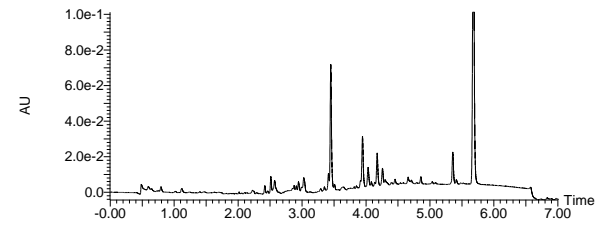

75. *Pellaea ovata* (pieces)

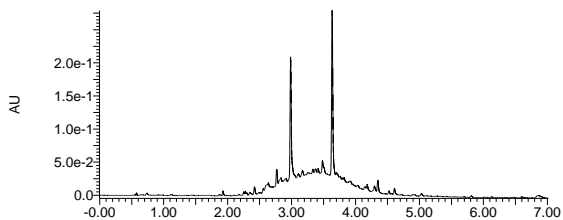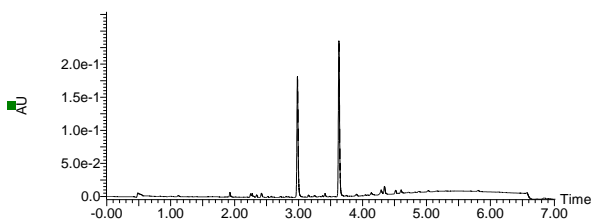

76. *Pellaea ovata* (leaflets)

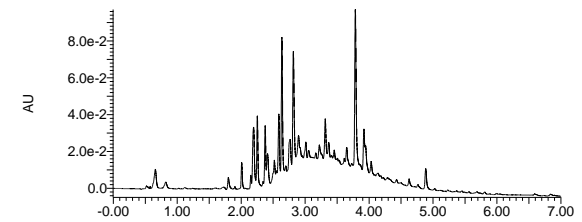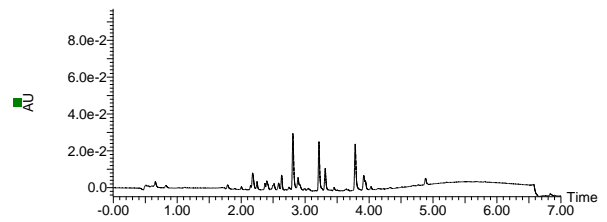

77. *Rhizophora mangle*

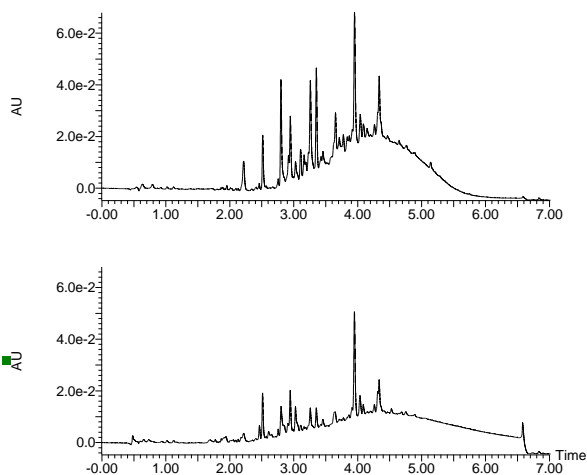

78. *Eriobotrya japonica*

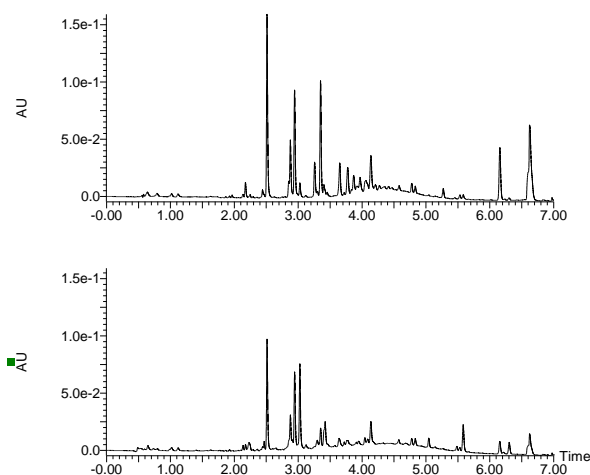

79. *Osteomeles schweriniae*

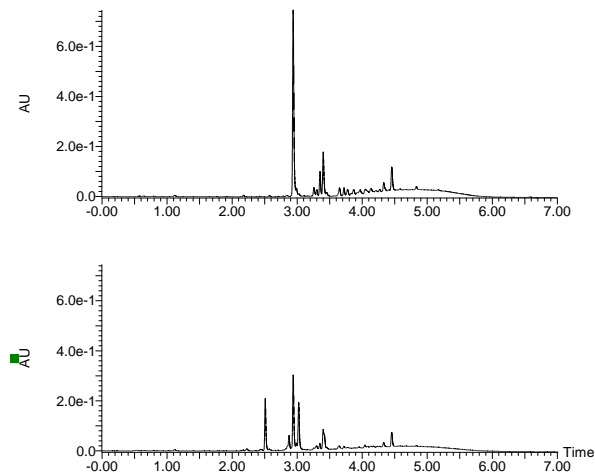

80. *Osteomeles schweriniae*

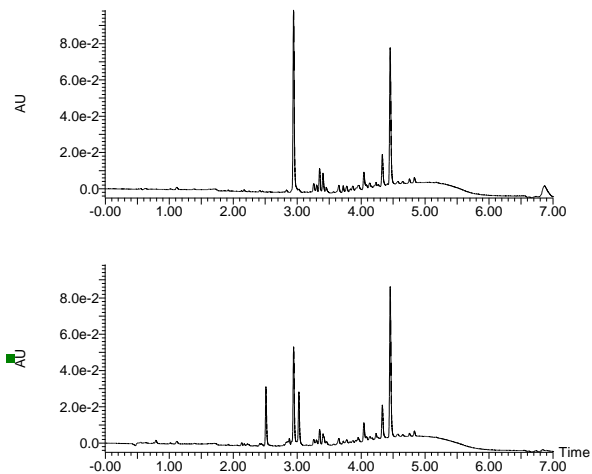

81. *Rhaphiolepis indica var. umbellata*

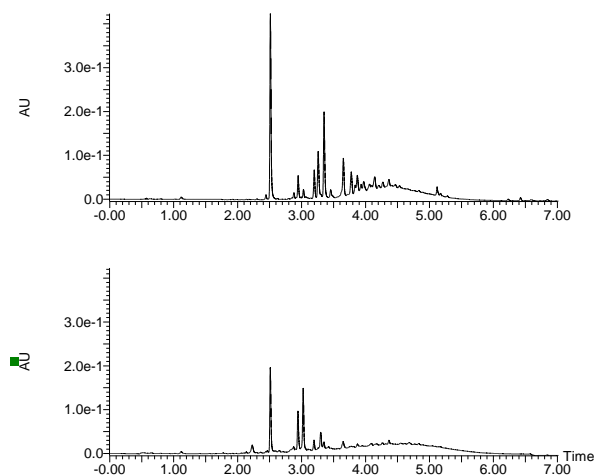

82. *Coffea arabica*

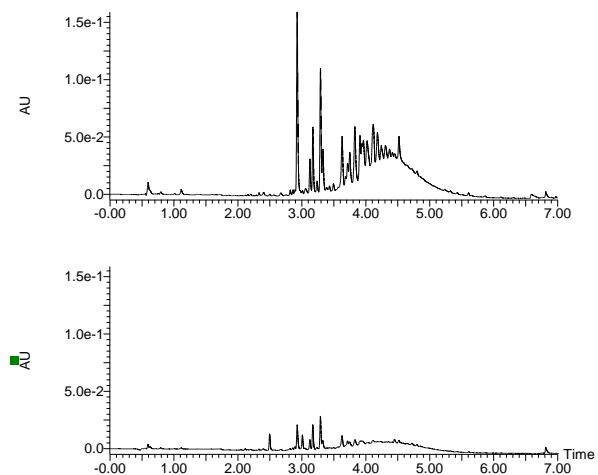

83. *Hoffmannia refulgens*

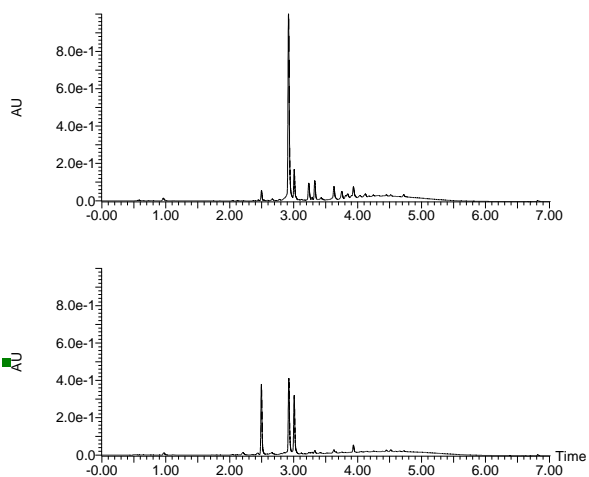

84. *Ixora coccinea* (leaves)

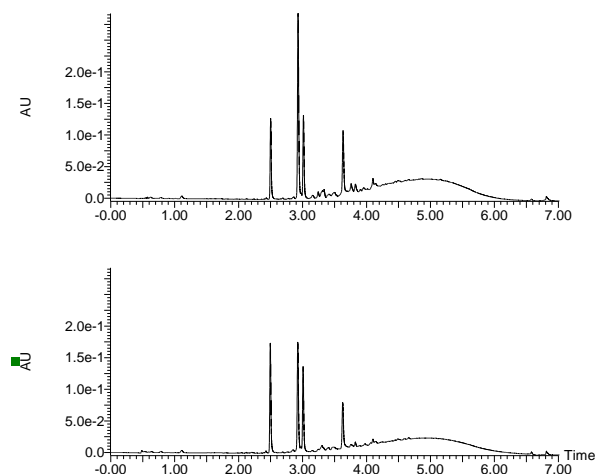

85. *Ixora coccinea* (flowers)

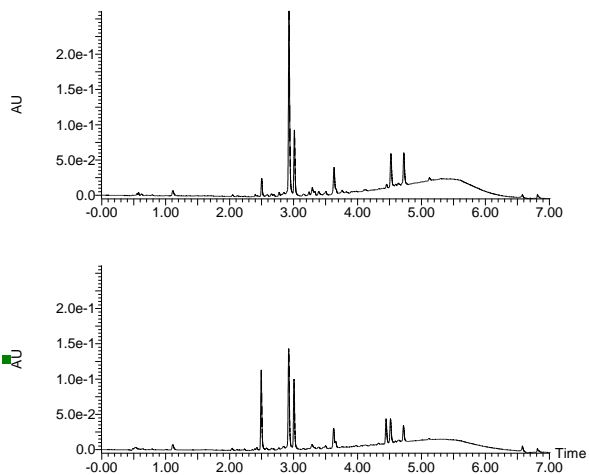

86. *Dimocarpus longan*

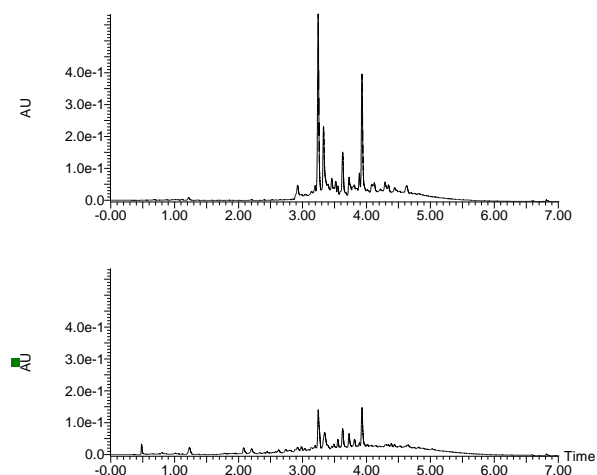

87. *Nephelium conratum*

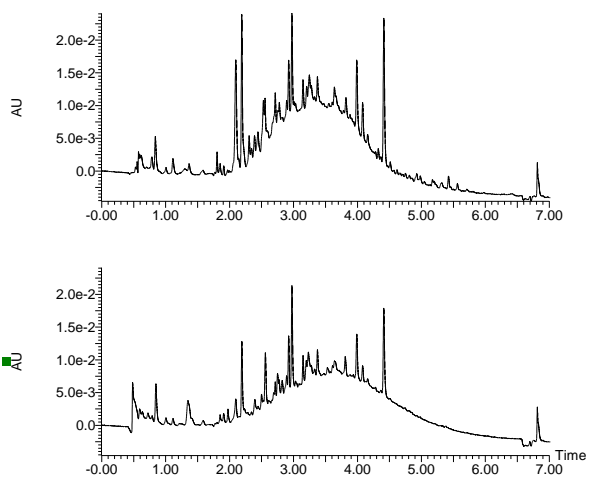

88. *Sideroxylon inerme*

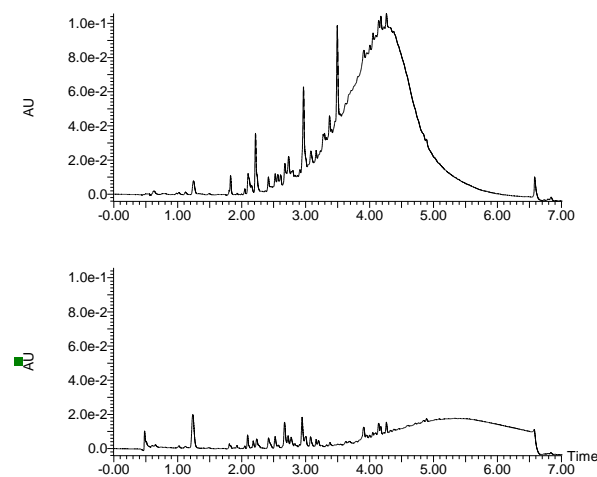



89. *Sarracenia purpurea*

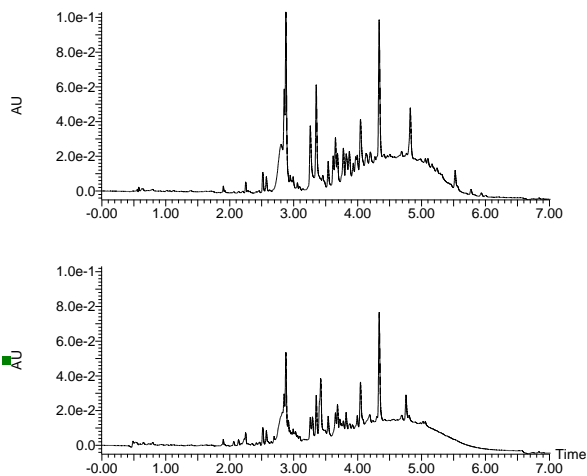

90. *Strelitzia reginae* (leaves)

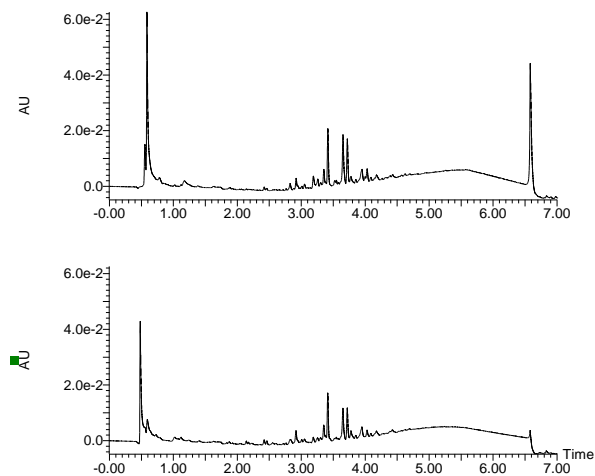

91. *Strelitzia reginae* (flowers)

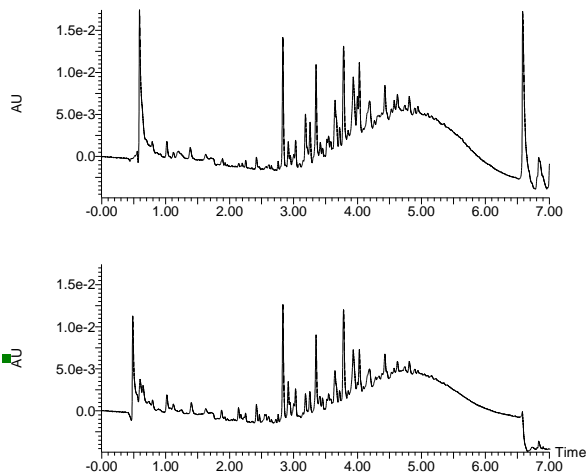

92. *Tectaria macrodonta*

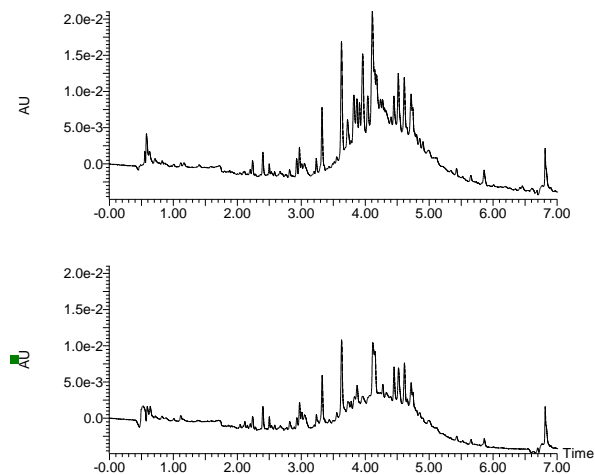

93. *Camellia japonica* (leaves)

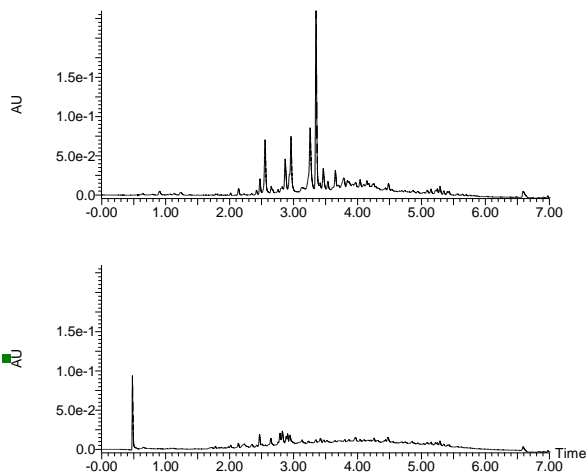

94. *Camellia japonica* (petals)

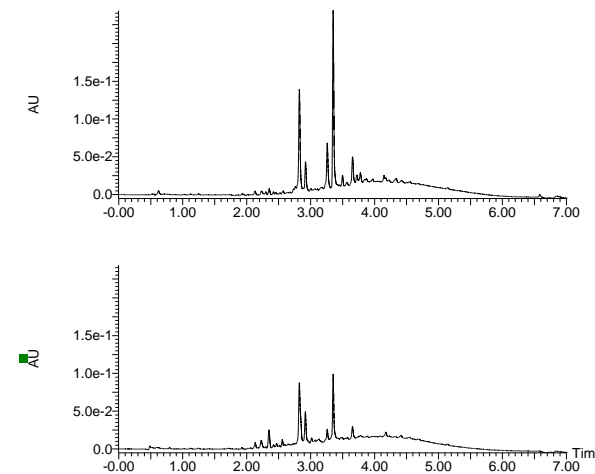

95. *Cissus javana*

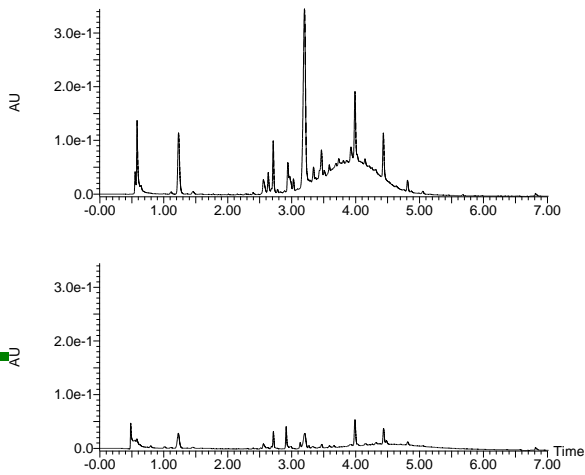

96. *Leea guineense*

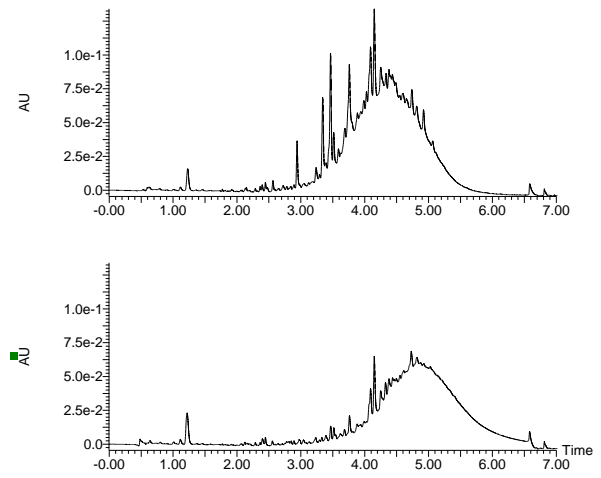

97. *Rhoicissus sp.*

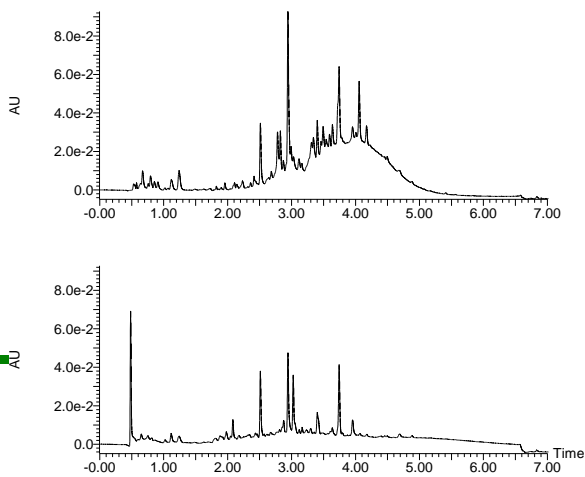

98. *Encephalartos ferox*

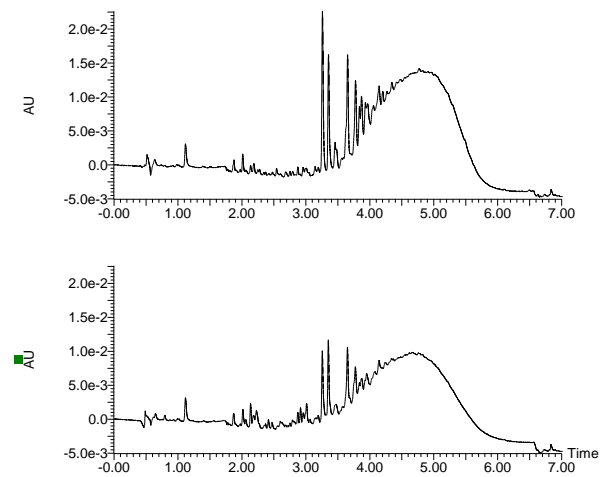

99. *Macrozamia communis*

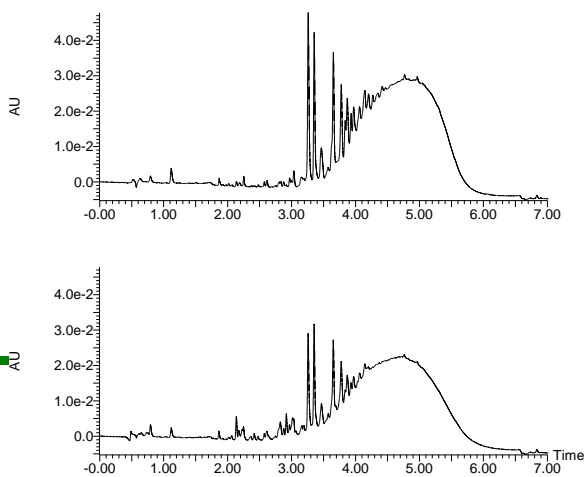

100. *Zamia furfuracea*

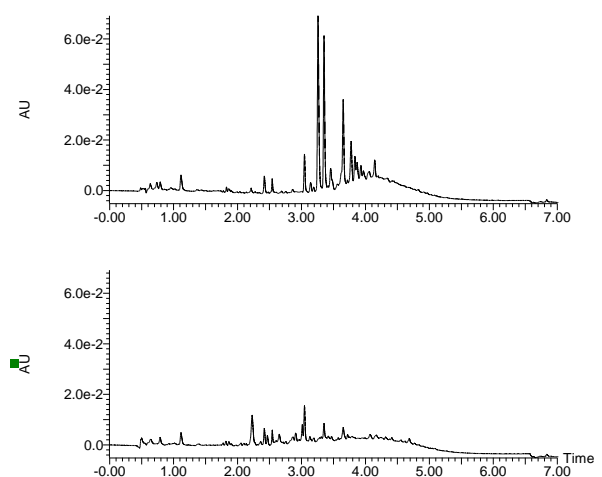

101. *Alpinia purpurata*

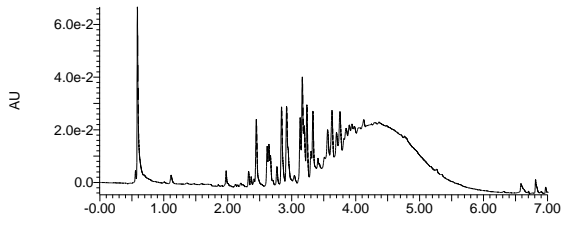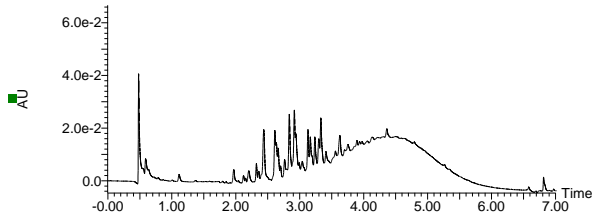

102. *Elettaria cardamomun*

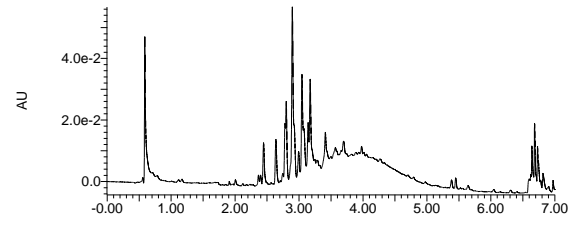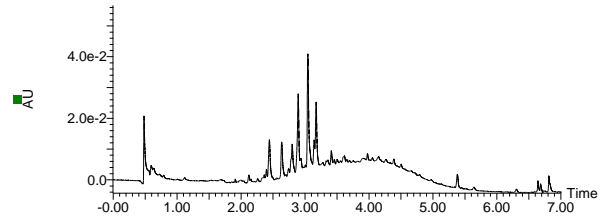

**Figure S2.** Correlations of different measured parameters without categorizing the 102 proanthocyanidin rich plant extracts.

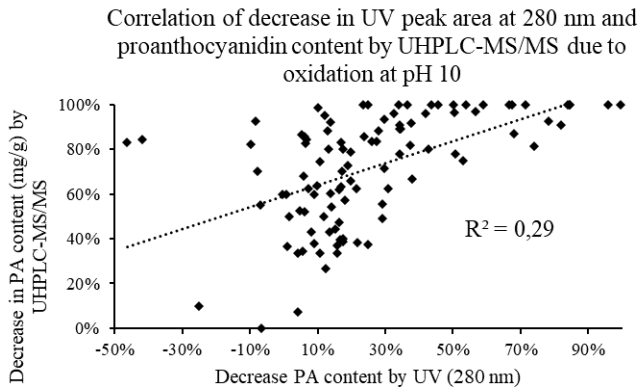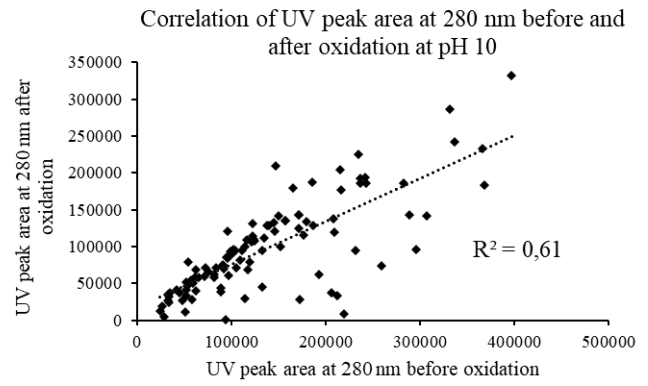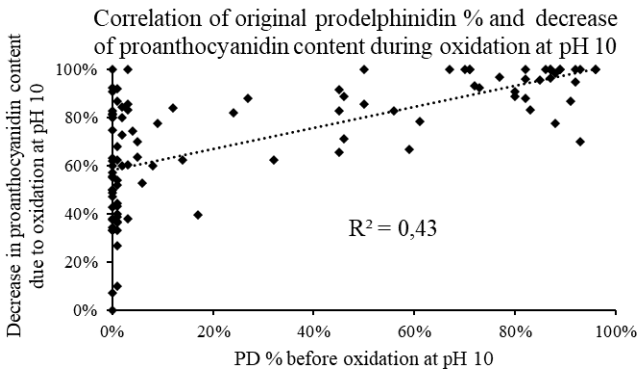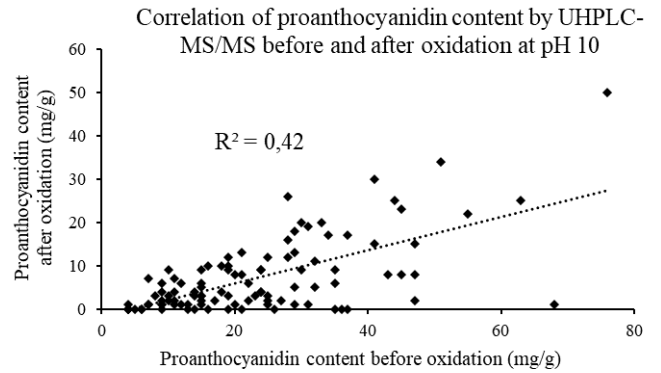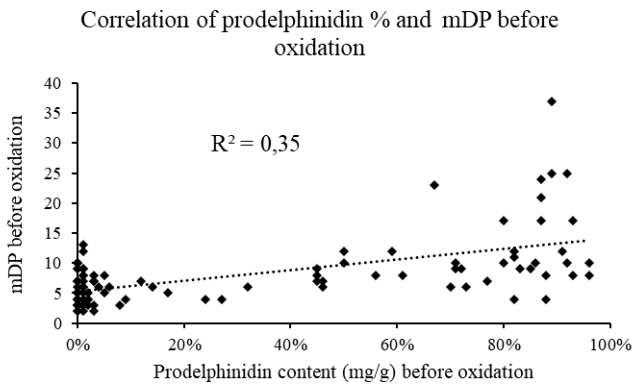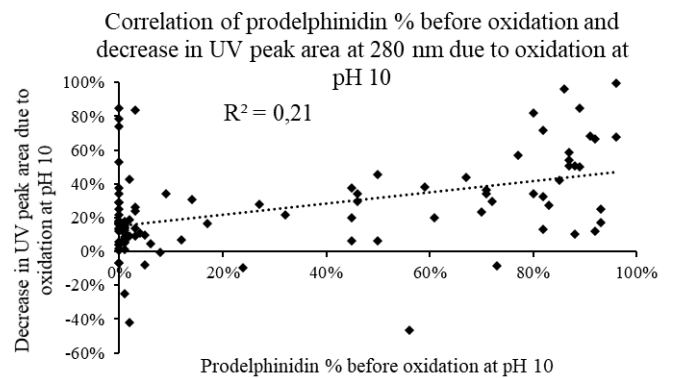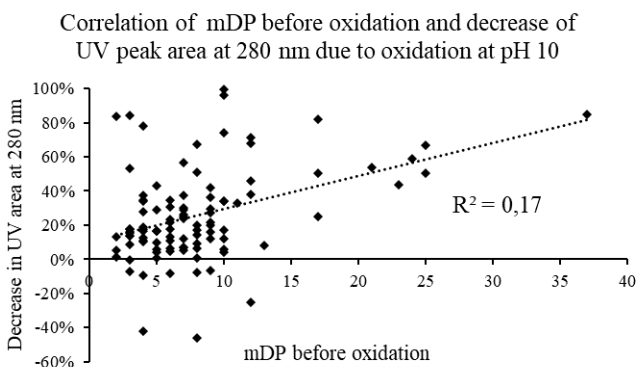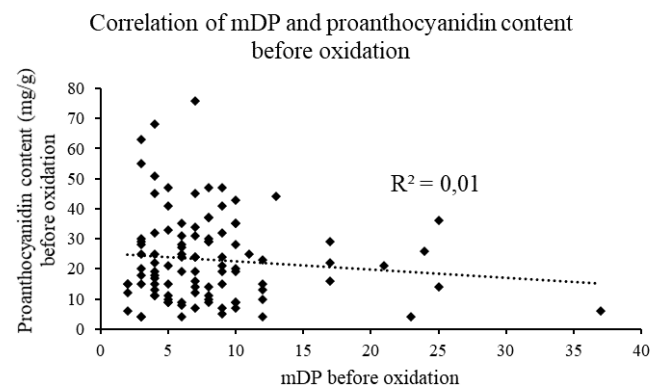

Correlation of proanthocyanidin content before oxidation and decrease in proanthocyanidin content by UHPLC-MS/MS due to oxidation at pH 10

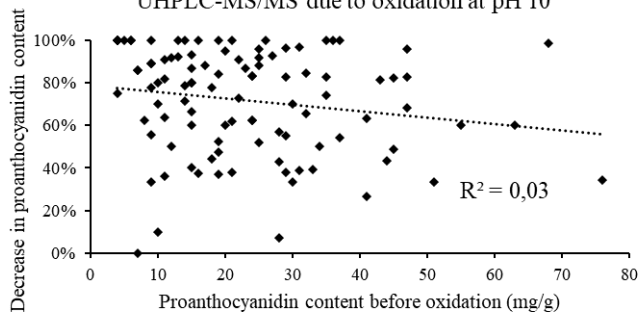

Correlation of original proanthocyanidin content and decrease in proanthocyanidin content due to oxidation at pH 10

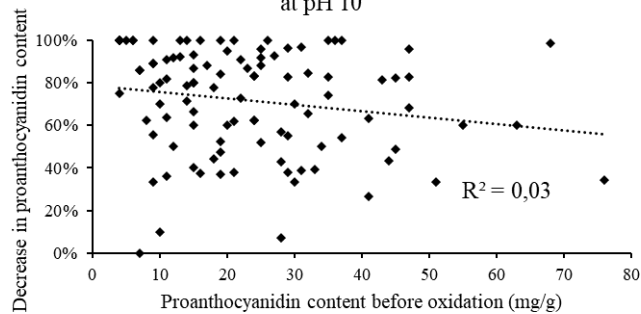

Correlation of proanthocyanidin content before oxidation and decrease in UV peak area at 280 nm due to oxidation at pH 10

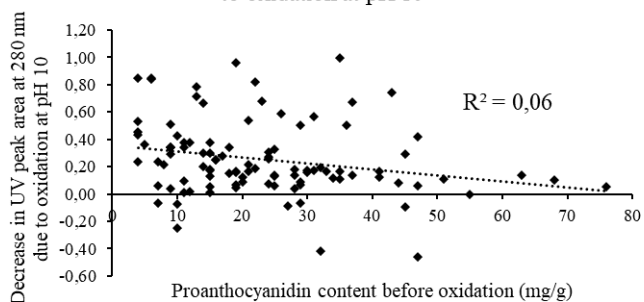

**Figure S3.** Correlations of different measured parameters for category A proanthocyanidin rich plant extracts.

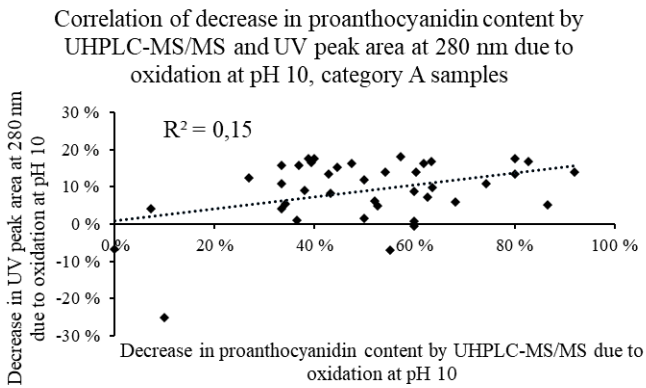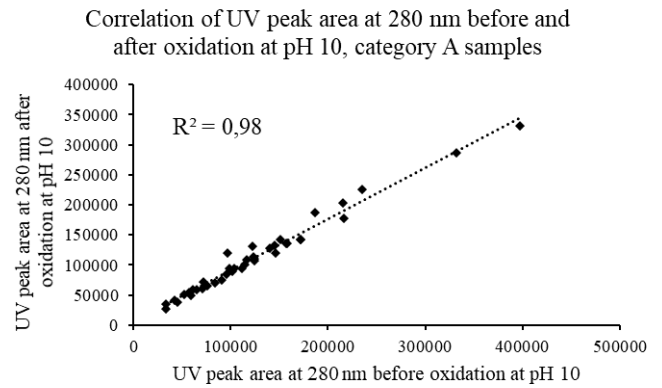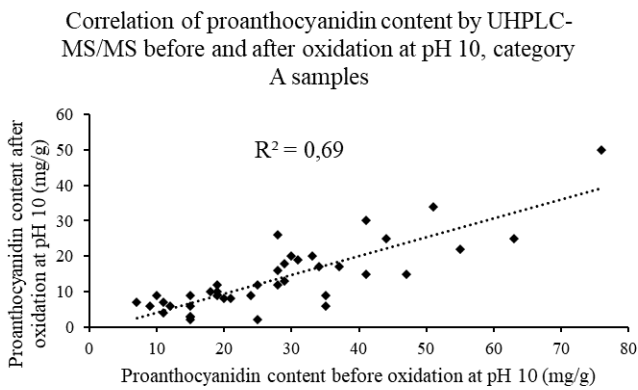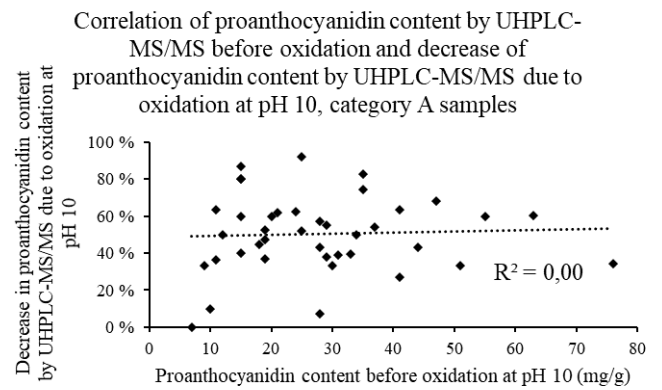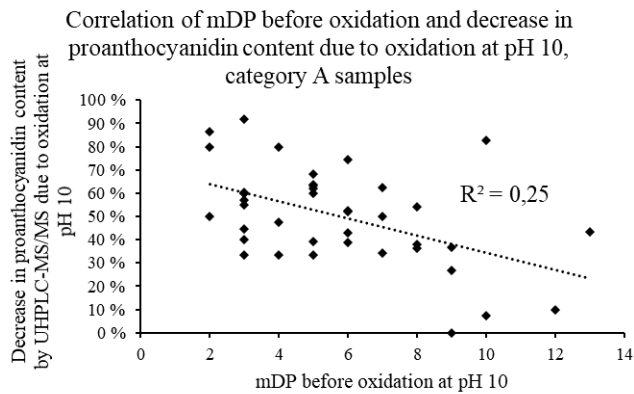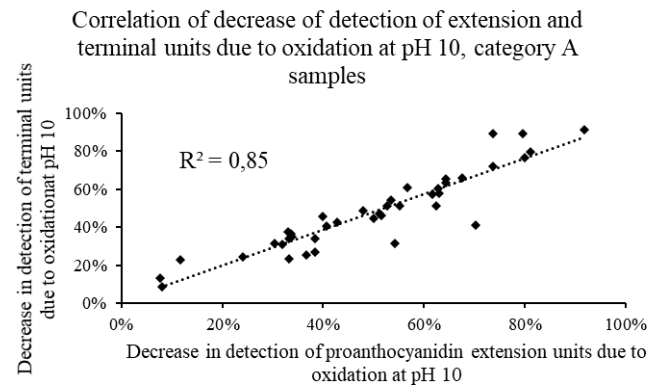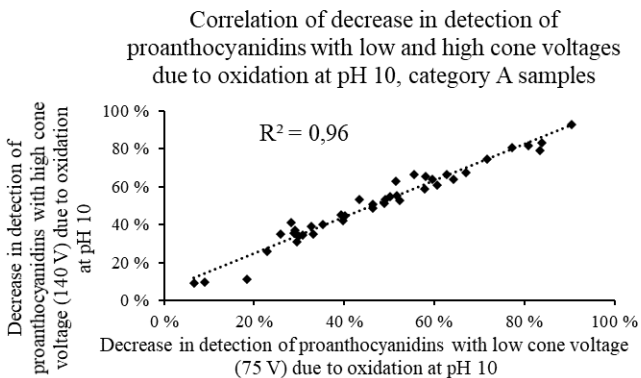

**Figure S4.** Correlations of different measured parameters for category B proanthocyanidin rich plant extracts.

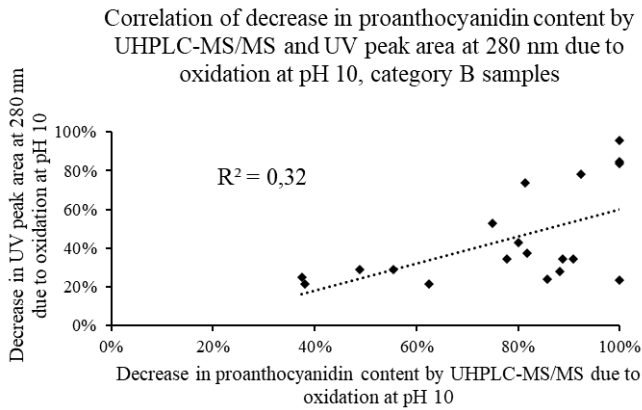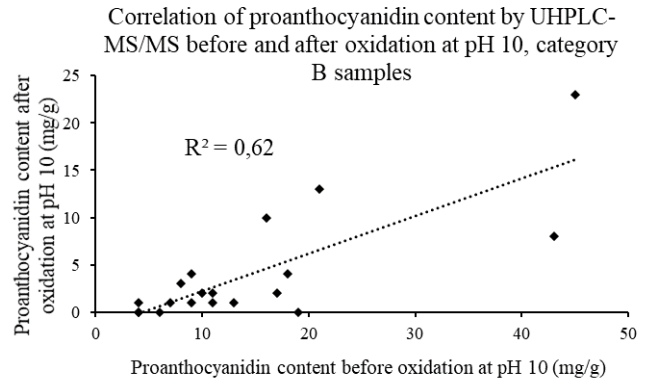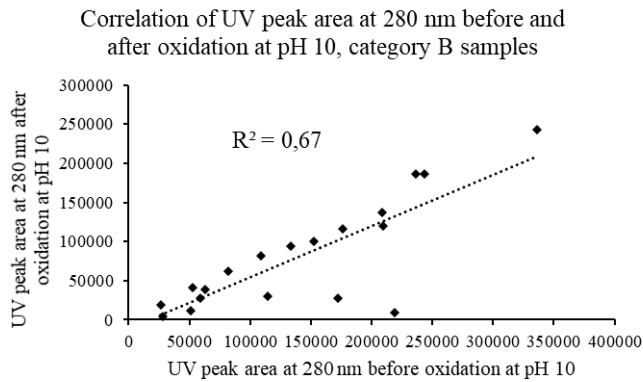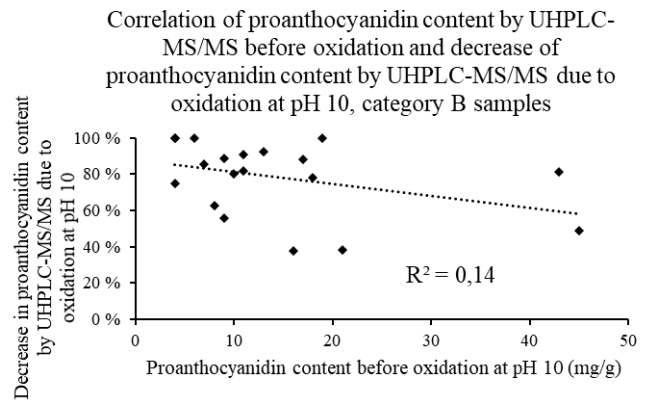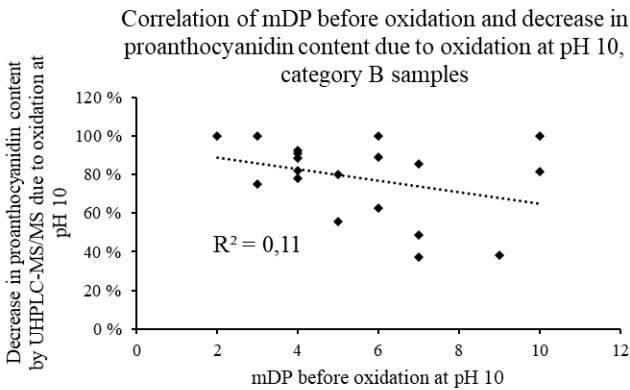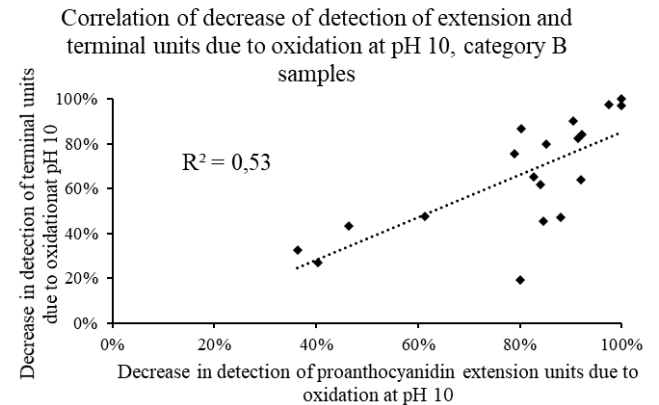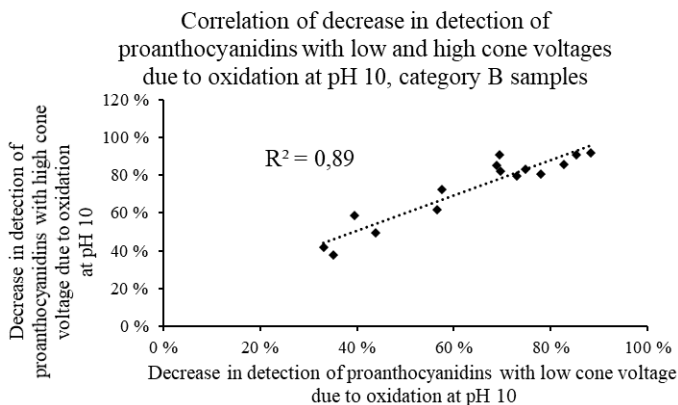

**Figure S5.** Correlations of different measured parameters for category C and D proanthocyanidin rich plant extracts.

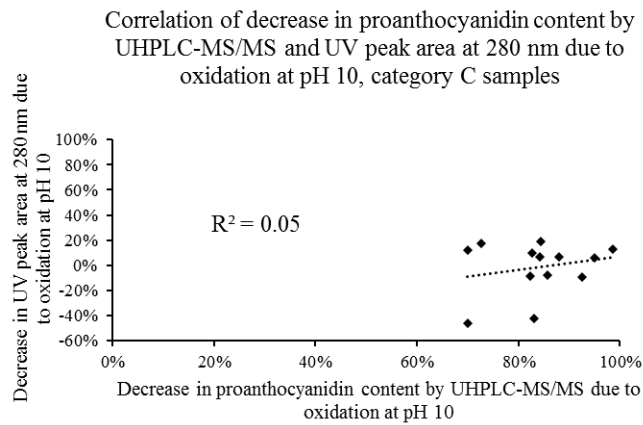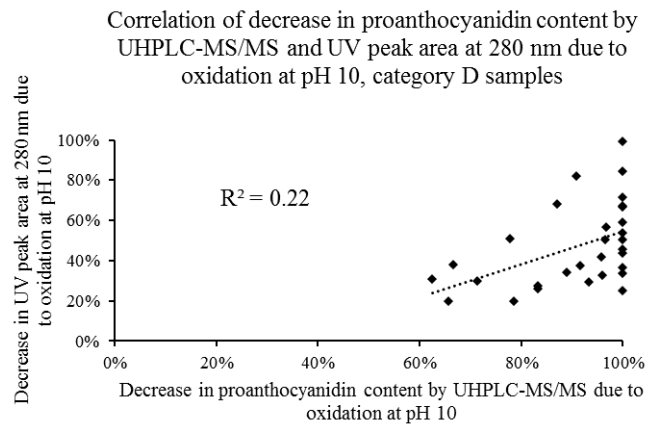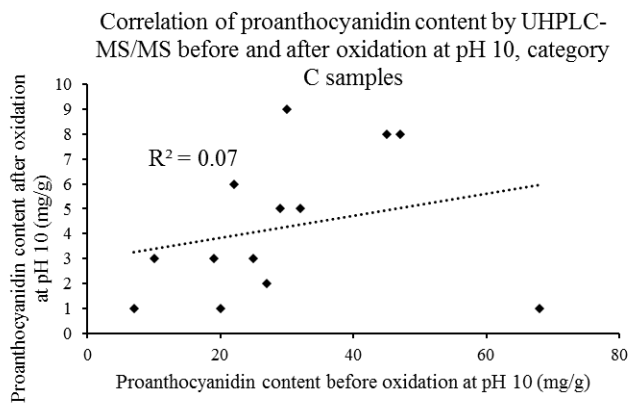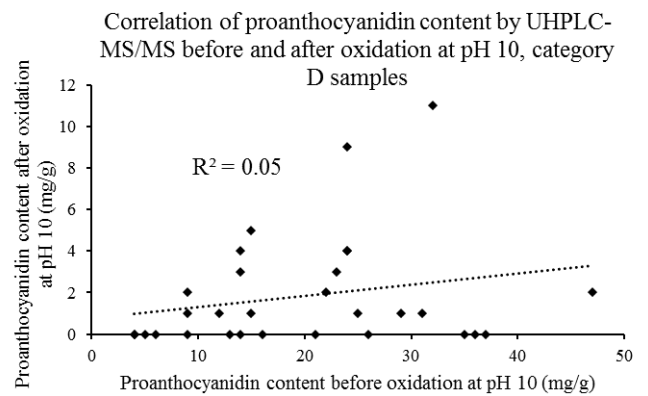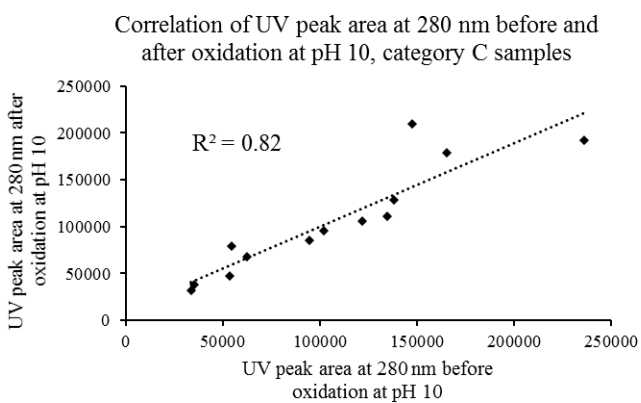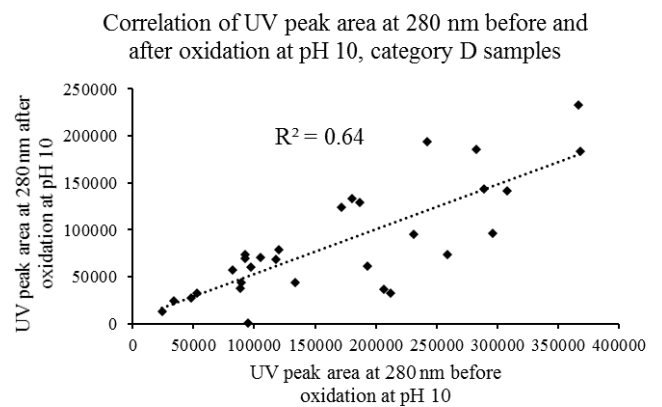

Supplement: ao0c05515_si_001.pdf [file ao0c05515_si_001.pdf]
